# Supplementary material for: Genetic and Epigenetic Determinants of Aggressiveness in Cribriform Carcinoma of the Prostate
Source: Oxford University Press journal article supplement (doi:10.1158/1541-7786.mcr-18-0440), 2018-10-17
Supplement: 15417786mcr180440-sup-201081_2_supp_5048599_pfxqx8.pdf [file 15417786mcr180440-sup-201081_2_supp_5048599_pfxqx8.pdf]

**Table S11.** Function and aberration of differentially methylated genes between Cribriform and noncribriform

| Gene                 | Gene name                                          | Function                                                       | Dysregulation              | Effect                                               | Reference |
|----------------------|----------------------------------------------------|----------------------------------------------------------------|----------------------------|------------------------------------------------------|-----------|
| <b>NR1I2 (PXR)</b>   | Nuclear Receptor Subfamily 1 Group I Member 2      | Regulating drug metabolism enzymes (cytochrome P450)           | Downregulation             | Sensitization to Chemotherapy                        | (1)       |
| <b>EVX1</b>          | Even-Skipped Homeobox 1                            | Repressor of gene transcription                                | Methylation                | BCR in moderate risk Pca                             | (2)       |
| <b>EPHX3 (ABHD9)</b> | Epoxide Hydrolase 3                                | epoxy hydrolase activity                                       | Methylation                | PSA relapse. Associated with high grade & recurrence | (3)       |
| <b>CXCL14</b>        | Chemokine (C-X-C Motif) Ligand 14                  | modulate antitumor immune responses                            | Downregulation             | Downregulated in PCa                                 | (4)       |
| <b>IRAK3</b>         | Interleukin 1 Receptor Associated Kinase 3         | immune defense against tumor growth                            | Methylation                | Progression into CRPC                                | (5)       |
| <b>ICAM5</b>         | Intercellular Adhesion Molecule 5                  | cell adhesion and signaling                                    | Downregulation             | Tumor progression                                    | (6)       |
| <b>CRMP1</b>         | Collapsin Response Mediator Protein 1              | invasion and metastasis suppressor function in prostate cancer | Downregulation             | Associated with high grade Pca                       | (7)       |
| <b>CMTM3</b>         | CKLF-Like MARVEL Transmembrane Domain Containing 3 | Inhibits tumor growth and proliferation                        | Downregulation             | Tumor proliferation Associated with higher GS        | (8) & (9) |
| <b>TIMP2/3</b>       | Tissue Inhibitor of Metalloproteinases 2/3         | Inhibition of metalloproteinases                               | Downregulation             | Enhances ECM degradation & invasion                  | (10)      |
| <b>SLIT2</b>         | Slit Guidance Ligand 2                             | Inhibition of cell migration towards chemotactic factors       | Methylated & downregulated | Proliferation & invasion                             | (11)      |

Abbreviations: PCa, prostate cancer; GS, Gleason score; BCR, Biochemical recurrence; CRPC, Castration Resistant Prostate Cancer; ECM, Extracellular matrix

## References

1. Chen Y, Tang Y, Wang MT, Zeng S, Nie D. Human pregnane X receptor and resistance to chemotherapy in prostate cancer. *Cancer research* **2007**;67:10361-7
2. Truong M, Yang B, Wagner J, Kobayashi Y, Rajamanickam V, Brooks J, *et al.* Even-skipped homeobox 1 is frequently hypermethylated in prostate cancer and predicts PSA recurrence. *British journal of cancer* **2012**;107:100-7
3. Stott-Miller M, Zhao S, Wright JL, Kolb S, Bibikova M, Klotzle B, *et al.* Validation study of genes with hypermethylated promoter regions associated with prostate cancer recurrence. *Cancer Epidemiol Biomarkers Prev* **2014**;23:1331-9
4. Song EY, Shurin MR, Tourkova IL, Gutkin DW, Shurin GV. Epigenetic mechanisms of promigratory chemokine CXCL14 regulation in human prostate cancer cells. *Cancer research* **2010**;70:4394-401
5. Angulo JC, Andres G, Ashour N, Sanchez-Chapado M, Lopez JJ, Roper S. Development of Castration Resistant Prostate Cancer can be Predicted by a DNA Hypermethylation Profile. *The Journal of urology* **2016**;195:619-26
6. Kammerer S, Roth RB, Reneland R, Marnellos G, Hoyal CR, Markward NJ, *et al.* Large-scale association study identifies ICAM gene region as breast and prostate cancer susceptibility locus. *Cancer research* **2004**;64:8906-10
7. Cai G, Wu D, Wang Z, Xu Z, Wong KB, Ng CF, *et al.* Collapsin response mediator protein-1 (CRMP1) acts as an invasion and metastasis suppressor of prostate cancer via its suppression of epithelial-mesenchymal transition and remodeling of actin cytoskeleton organization. *Oncogene* **2017**;36:546-58
8. Di Meo S, Airoidi I, Sorrentino C, Zorzoli A, Esposito S, Di Carlo E. Interleukin-30 expression in prostate cancer and its draining lymph nodes correlates with advanced grade and stage. *Clinical cancer research : an official journal of the American Association for Cancer Research* **2014**;20:585-94
9. Hu F, Yuan W, Wang X, Sheng Z, Yuan Y, Qin C, *et al.* CMTM3 is reduced in prostate cancer and inhibits migration, invasion and growth of LNCaP cells. *Clinical & translational oncology : official publication of the Federation of Spanish Oncology Societies and of the National Cancer Institute of Mexico* **2015**;17:632-9
10. Shin YJ, Kim JH. The role of EZH2 in the regulation of the activity of matrix metalloproteinases in prostate cancer cells. *PloS one* **2012**;7:e30393
11. Yu J, Cao Q, Yu J, Wu L, Dallol A, Li J, *et al.* The neuronal repellent SLIT2 is a target for repression by EZH2 in prostate cancer. *Oncogene* **2010**;29:5370-80
