# Supplementary material for: Genetic and Epigenetic Determinants of Aggressiveness in Cribriform Carcinoma of the Prostate
Source: Oxford University Press journal article supplement (doi:10.1158/1541-7786.mcr-18-0440), 2018-10-17
Supplement: 15417786mcr180440-sup-201081_2_supp_5048601_pfxqx8.xlsx [file 15417786mcr180440-sup-201081_2_supp_5048601_pfxqx8.xlsx]

## Sheet: S5
	Top-ranked mutation events in Cribriform Carcinoma (ICC), arranged by p-values
	Gene	# ICC	% ICC	OR	95%CI		p-value	q-value
	SPOP	28	17.07	6.794	2.128	21.67	0	0
	ATM	12	7.32	7.974	1.211	86.33	0.019	0.1
	ETV4	11	6.71	2.373	0.7064	8.098	0.26	0.76
	MUC16	13	7.93	2.109	0.6847	6.057	0.302	0.76
	MUC17	10	6.1	1.591	0.5203	4.707	0.577	1
	FOXA1	9	5.49	1.423	0.4353	4.269	0.772	1
	ETV1	15	9.15	0.9262	0.4132	2.12	0.833	1
	ERG	76	46.34	0.9716	0.6011	1.573	1	1
	TTN	20	12.2	1.042	0.5044	2.234	1	1
	TP53	14	8.54	1.097	0.4399	2.621	1	1

## Sheet: S6
	Overexpressed and underexpressed genes in Cribriform Carcinoma (ICC)
	Underexpressed genes in Cribriform							Overexpressed genes in Cribriform
	Gene	logFC	AveExpr	t	p-value	q-value		Gene	logFC	AveExpr	t	p-value	q-value
	PAGE4	-1.64679	6.55103	-6.61959	1.97303e-10	4.29923e-07		ATP12A	1.12783	3.42048	3.31011	0.00106125	0.0119739
	DPT	-1.6293	6.55817	-7.30185	3.28104e-12	5.71951e-08		DNAH8	1.01558	7.72086	3.65124	0.00031407	0.00487522
	ACTC1	-1.56344	6.71533	-5.6141	4.95583e-08	1.03724e-05		UGT2B15	1	3.38298	3.56758	0.000427076	0.00610229
	LOC572558	-1.55016	5.10876	-6.29801	1.23825e-09	1.04634e-06		DIRAS2	0.990684	4.03278	3.69811	0.000263744	0.00429681
	CKM	-1.54952	4.50853	-4.83765	2.22536e-06	0.000117553		EN2	0.9718	3.58262	4.22065	3.34379e-05	0.000873896
	SLC7A4	-1.54937	5.36332	-4.94483	1.35023e-06	8.22976e-05		COL10A1	0.956482	6.56522	3.77568	0.000196774	0.0034336
	HRNBP3	-1.47413	6.29385	-6.31536	1.12322e-09	1.04634e-06		ALB	0.914856	3.9704	2.77202	0.00596374	0.040773
	CD38	-1.47099	7.21995	-4.50596	9.89817e-06	0.000338988		MELK	0.883624	5.48611	5.76875	2.21003e-08	6.11511e-06
	IGSF1	-1.45585	3.86311	-6.91651	3.42701e-11	1.49349e-07		DLGAP5	0.879606	5.22123	5.66645	3.77729e-08	8.89807e-06
	DPYS	-1.43643	4.02019	-4.50686	9.85958e-06	0.000338424		GRIN3A	0.866784	7.3709	2.84147	0.00483758	0.0352692
	CPNE6	-1.41073	3.65584	-5.34507	1.9428e-07	2.40879e-05		F5	0.860994	9.99782	3.56071	0.000437892	0.00623129
	STAC	-1.33078	5.71091	-6.29483	1.2605e-09	1.04634e-06		KIF18B	0.857437	4.64921	5.50171	8.82225e-08	1.42398e-05
	EDN3	-1.31277	4.01844	-5.94981	8.41504e-09	3.2598e-06		MYBL2	0.856912	6.62504	5.23176	3.40255e-07	3.32759e-05
	RSPO2	-1.3005	5.29039	-6.79321	7.13356e-11	2.48705e-07		ANGPTL3	0.851233	2.80176	3.10646	0.00209802	0.0196101
	SRD5A2	-1.27522	6.87876	-6.04282	5.08173e-09	2.46068e-06		NKAIN1	0.850651	8.10134	2.78952	0.0056596	0.0393531
	KY	-1.26667	3.78831	-6.72808	1.04698e-10	3.04183e-07		COL11A1	0.847493	2.78428	3.67161	0.000291182	0.00464399
	CCK	-1.25689	4.84954	-3.89285	0.000125275	0.00246478		SSPO	0.83864	6.0623	4.48184	1.09978e-05	0.000367973
	C7	-1.24331	9.91228	-6.32237	1.07981e-09	1.04634e-06		RFX6	0.83381	3.87756	3.33922	0.000960078	0.0111864
	LGR6	-1.24284	4.93566	-5.48042	9.83147e-08	1.47898e-05		AMH	0.83292	3.09846	3.42553	0.000710417	0.0089674
	VSIG2	-1.2412	7.78431	-4.19425	3.73072e-05	0.000959201		TROAP	0.822601	5.27196	5.29997	2.43085e-07	2.66507e-05
	LIX1	-1.23647	3.31236	-5.20612	3.85767e-07	3.55804e-05		KIF20A	0.815453	6.0506	5.34645	1.92947e-07	2.40879e-05
	ANGPTL1	-1.22194	5.46803	-7.02752	1.75818e-11	1.02162e-07		ESM1	0.812857	5.28861	3.66672	0.000296524	0.00469259
	ATP1A2	-1.22021	8.38186	-6.16451	2.60509e-09	1.81648e-06		CENPA	0.811968	4.31576	5.30724	2.34481e-07	2.60348e-05
	PROK1	-1.20853	5.00731	-5.43528	1.23563e-07	1.75627e-05		C17orf55	0.802129	2.63919	3.9694	9.27238e-05	0.00195685
	SLC5A8	-1.20089	3.07164	-4.63529	5.58566e-06	0.00022253		BUB1	0.791829	5.90278	5.17165	4.56361e-07	3.9634e-05
	CAPN6	-1.2003	5.96718	-5.01116	9.86948e-07	6.8217e-05		KIF4A	0.786189	6.1213	4.98289	1.12844e-06	7.39511e-05
	JPH4	-1.19504	6.92883	-6.41858	6.26528e-10	8.40126e-07		LOC338651	0.779381	3.59135	4.7689	3.05255e-06	0.000145388
	MAL	-1.18536	3.79826	-6.43569	5.68377e-10	8.40126e-07		UTS2D	0.776626	2.64157	3.38322	0.000824059	0.0100666
	IP6K3	-1.18339	4.28201	-5.74681	2.48064e-08	6.75663e-06		ACCN1	0.776122	2.93577	2.97263	0.00322264	0.0266116
	NRK	-1.18224	5.39384	-6.31844	1.1039e-09	1.04634e-06		BIRC5	0.767755	5.61219	5.32273	2.1712e-07	2.46888e-05
	ADRA1D	-1.18087	4.28853	-5.66324	3.84084e-08	8.92714e-06		RRM2	0.766402	7.2965	5.32648	2.13119e-07	2.46672e-05
	C1orf64	-1.17979	5.61771	-3.16706	0.00171904	0.0171334		KIF14	0.76265	4.2371	5.3437	1.9561e-07	2.40879e-05
	RPE65	-1.17495	2.33149	-5.4347	1.23922e-07	1.75627e-05		IQGAP3	0.758058	5.94888	4.88804	1.76126e-06	9.93601e-05
	PENK	-1.17241	4.77781	-4.77784	2.93013e-06	0.000142676		GTSE1	0.756272	5.43846	5.51134	8.40005e-08	1.37917e-05
	TMEM35	-1.16584	6.83447	-5.8965	1.12069e-08	3.75688e-06		PLK1	0.754486	6.15457	5.55374	6.76219e-08	1.22213e-05
	TMEM132C	-1.1634	4.41111	-6.07832	4.18587e-09	2.28025e-06		TOP2A	0.751979	8.28811	5.14304	5.2435e-07	4.37343e-05
	BMPER	-1.16031	5.01558	-5.73021	2.70675e-08	7.1491e-06		CDC20	0.748226	6.38747	5.35895	1.81276e-07	2.34074e-05
	RNF112	-1.15426	4.95239	-7.15451	8.12481e-12	7.08158e-08		UBE2C	0.744696	6.02224	4.88483	1.78784e-06	0.000100534
	PYGM	-1.14076	7.16635	-6.42769	5.94862e-10	8.40126e-07		EPR1	0.744409	6.05851	5.09553	6.59476e-07	4.97662e-05
	BMP5	-1.13586	2.72327	-3.40471	0.000764377	0.00949048		ZNF467	0.735283	7.63482	6.10292	3.65772e-09	2.12538e-06
	CCBE1	-1.13125	3.45358	-5.9414	8.80501e-09	3.33672e-06		POLQ	0.734934	4.28905	5.08999	6.77272e-07	5.08888e-05
	PEBP4	-1.12917	7.35576	-4.27744	2.63739e-05	0.000730923		MNX1	0.731781	4.86584	3.11205	0.00206008	0.0193213
	WISP2	-1.12867	4.9255	-4.96717	1.21539e-06	7.73236e-05		LRRC7	0.73049	5.32726	2.97887	0.0031598	0.0262794
	SMOC1	-1.12491	8.0025	-5.3043	2.37924e-07	2.625e-05		CENPI	0.726813	2.89657	5.00306	1.02563e-06	6.91203e-05
	PI16	-1.11316	5.96504	-3.76643	0.000203826	0.00353191		NEIL3	0.726275	2.94468	4.98065	1.14047e-06	7.44593e-05
	VSTM2A	-1.1123	4.45447	-2.99982	0.00295709	0.0252315		CDC25C	0.722864	3.98378	4.65556	5.10074e-06	0.000207174
	ASPA	-1.10985	3.15904	-6.49557	4.03627e-10	7.81781e-07		EXO1	0.722565	4.41516	4.92816	1.46013e-06	8.70445e-05
	A2BP1	-1.10932	2.65111	-6.14119	2.96317e-09	1.84479e-06		CELSR3	0.718303	6.51503	3.6987	0.000263167	0.00429142
	PGM5	-1.1077	10.4305	-6.03148	5.40578e-09	2.4952e-06		HMMR	0.710076	6.07472	4.83109	2.29382e-06	0.000120439
	LDB3	-1.10401	7.81825	-6.15619	2.72769e-09	1.82881e-06		TPX2	0.709579	7.43617	5.39993	1.47632e-07	2.04247e-05
	GLB1L3	-1.10043	7.5121	-3.93373	0.000106743	0.00219946		NEK2	0.706773	5.19443	4.35004	1.94013e-05	0.000576157
	MYOCD	-1.09491	7.16793	-5.88494	1.19225e-08	3.82533e-06		ESPL1	0.706288	5.16922	4.77272	2.99962e-06	0.000144446
	FRMPD4	-1.09468	2.45774	-5.28932	2.56241e-07	2.7459e-05		SHCBP1	0.703665	4.86712	5.18675	4.24013e-07	3.82974e-05
	CA14	-1.08829	3.65788	-5.55792	6.619e-08	1.22213e-05		ONECUT2	0.694383	7.05875	3.24741	0.0013138	0.0139904
	NDP	-1.08393	5.02233	-6.02098	5.7236e-09	2.5583e-06		CDK1	0.693504	7.08505	5.19162	4.14068e-07	3.75939e-05
	SCN7A	-1.08051	6.57255	-5.72174	2.82962e-08	7.36208e-06		CDC45	0.687727	4.86057	4.25728	2.87005e-05	0.000778082
	GRIA3	-1.07709	3.49427	-5.55659	6.66408e-08	1.22213e-05		CYP4Z2P	0.685607	2.24284	3.25492	0.00128085	0.0136896
	VIT	-1.07594	3.94184	-5.27189	2.79291e-07	2.89798e-05		AURKB	0.680417	4.79664	4.65514	5.11043e-06	0.000207174
	CYP27A1	-1.074	9.10225	-6.18571	2.31661e-09	1.68263e-06		CKAP2L	0.677087	4.24951	4.62437	5.86487e-06	0.000230246
	PAH	-1.07085	2.5824	-3.54045	0.000471269	0.00657739		ISX	0.67571	5.71031	3.95715	9.73259e-05	0.00203427
	ANO4	-1.06676	6.03761	-5.71376	2.95046e-08	7.56359e-06		CENPF	0.673381	7.65401	4.97213	1.18728e-06	7.58121e-05
	TBX4	-1.06606	4.58136	-3.86045	0.000142089	0.00271888		KRTAP5-1	0.673213	2.31658	4.32836	2.12731e-05	0.000621162
	HIF3A	-1.06404	5.4689	-6.06302	4.55136e-09	2.29047e-06		C9orf163	0.669082	4.06118	5.44554	1.17317e-07	1.69014e-05
	ORM2	-1.06309	5.94717	-2.91801	0.0038233	0.0301301		E2F7	0.666879	3.98378	4.74237	3.44523e-06	0.0001566
	ACTA1	-1.06242	4.37441	-3.28017	0.00117561	0.012908		RDM1	0.665445	1.73583	4.77588	2.95663e-06	0.000143167
	PTGDS	-1.05865	10.7309	-5.56171	6.49125e-08	1.22213e-05		DEPDC1B	0.663514	4.79651	4.74341	3.42894e-06	0.000156474
	HPSE2	-1.05564	5.07803	-5.2127	3.73558e-07	3.48228e-05		HJURP	0.663443	6.10019	4.36163	1.84663e-05	0.000555967
	FREM2	-1.04494	6.7346	-5.55676	6.6584e-08	1.22213e-05		MND1	0.663266	3.44658	4.35411	1.90682e-05	0.000569979
	C21orf62	-1.04378	2.77349	-5.51293	8.33193e-08	1.37917e-05		ASPM	0.663055	5.71177	4.34224	2.0056e-05	0.000590567
	CHRDL1	-1.03915	9.82628	-5.69565	3.24373e-08	7.96405e-06		NCAPH	0.660087	5.48462	4.60143	6.49608e-06	0.000246709
	KIAA1210	-1.0382	6.57754	-3.90254	0.000120622	0.00240033		CEP55	0.656456	5.4021	4.657	5.06783e-06	0.000206407
	HSPB8	-1.03791	9.91623	-6.03034	5.43927e-09	2.4952e-06		ANLN	0.655225	6.34633	4.55957	7.82039e-06	0.00028342
	PCOTH	-1.03419	7.31038	-3.34196	0.000951024	0.0111171		NCAPG	0.655224	6.09462	4.79243	2.74067e-06	0.000135813
	FXYD1	-1.03224	6.27511	-6.06112	4.59881e-09	2.29047e-06		SGOL1	0.644102	3.52459	4.50679	9.86228e-06	0.000338424
	LGI3	-1.02921	3.98068	-5.78363	2.0431e-08	5.7444e-06		PBK	0.641457	5.01101	4.03972	7.00446e-05	0.00156594
	PGM5P2	-1.02647	4.05917	-6.23734	1.73857e-09	1.31768e-06		NUF2	0.637019	4.57085	4.45338	1.24455e-05	0.000404004
	ACTG2	-1.02494	13.3779	-5.5938	5.50334e-08	1.09716e-05		KIF15	0.636695	5.11516	4.25448	2.90391e-05	0.00078482
	FLNC	-1.02418	11.6067	-5.60635	5.15814e-08	1.04554e-05		FOXM1	0.636058	7.19596	4.97433	1.17504e-06	7.58121e-05
	SORCS1	-1.0236	4.17068	-5.6861	3.40945e-08	8.21187e-06		FAM64A	0.632405	4.72004	4.74052	3.47438e-06	0.000156655
	ACOX2	-1.02282	6.25659	-5.87295	1.27118e-08	3.88757e-06		NUSAP1	0.629991	7.15343	4.79909	2.65812e-06	0.000134048
	OGN	-1.02281	8.7344	-5.95571	8.15113e-09	3.22933e-06		PTTG1	0.619099	6.10501	4.76014	3.17717e-06	0.000148789
	P2RX2	-1.0213	4.30172	-5.24244	3.22872e-07	3.23466e-05		MCM10	0.615825	4.05101	4.29802	2.41857e-05	0.000685751
	SFTPA2	-1.01746	9.70422	-4.30704	2.32822e-05	0.000664247		PKMYT1	0.611679	5.87742	4.34301	1.99902e-05	0.000590567
	NEFH	-1.01653	11.5145	-2.80795	0.0053544	0.0378346		DNAJC22	0.609184	4.91341	3.20237	0.00152847	0.0156547
	NCAM1	-1.01651	6.92176	-5.23193	3.3996e-07	3.32759e-05		RAD54L	0.608417	4.81926	4.59015	6.82999e-06	0.00025715
	SRPX	-1.0076	6.77616	-6.26078	1.52536e-09	1.20864e-06		ITGBL1	0.607585	7.50037	3.22036	0.00143911	0.0149804
	SLC2A4	-1.00344	6.7878	-5.86734	1.30984e-08	3.93674e-06		KIAA0101	0.603069	6.16826	4.78065	2.89266e-06	0.000141643
	ADRA1A	-1.00339	4.69824	-5.49355	9.19652e-08	1.4574e-05		MMP11	0.602961	7.31104	4.12116	5.03731e-05	0.00121118
	CYP11A1	-0.998918	2.60364	-6.31395	1.13214e-09	1.04634e-06		FAM111B	0.601206	6.54855	4.62106	5.95215e-06	0.000232641
	WIF1	-0.995358	4.6826	-3.71058	0.000251696	0.00414312		SPC25	0.601033	4.28927	4.14199	4.62608e-05	0.00113261
	HMGCLL1	-0.994567	3.15398	-5.64834	4.15016e-08	9.51917e-06		ASF1B	0.596951	6.41364	4.91933	1.52183e-06	8.93488e-05
	HSPB6	-0.993978	9.99994	-5.87928	1.22888e-08	3.82533e-06		CBX2	0.593238	6.42245	3.88352	0.000129912	0.00254586
	MT1A	-0.993761	3.7533	-4.73746	3.52305e-06	0.000157876		CASC5	0.592709	4.49644	3.75263	0.000214781	0.00366705
	COL4A6	-0.993641	7.42967	-5.32614	2.13478e-07	2.46672e-05		KIFC1	0.590184	6.69919	5.02192	9.37784e-07	6.6184e-05
	TBX5	-0.990177	4.72112	-4.9597	1.259e-06	7.9279e-05		SPAG5	0.588704	7.09679	5.29853	2.4482e-07	2.66731e-05
	NTRK3	-0.990144	4.97162	-5.4891	9.40722e-08	1.46959e-05		FAM57B	0.588543	2.45514	3.25728	0.00127066	0.0136141
	GFRA1	-0.984615	7.03385	-5.8209	1.67718e-08	4.87278e-06		SKA3	0.58536	5.16645	4.4324	1.36286e-05	0.000433527
	FAT3	-0.980918	5.95584	-5.26282	2.92053e-07	2.99475e-05		MKI67	0.582652	8.54336	4.46438	1.18658e-05	0.000390151
	UBXN10	-0.978117	5.27251	-6.1168	3.38908e-09	2.03718e-06		PTK6	0.582391	7.3858	2.88514	0.0042323	0.0321598
	PPP1R1A	-0.97164	4.65263	-4.89872	1.6757e-06	9.6088e-05		ULBP1	0.580468	3.1067	3.79244	0.000184591	0.00328346
	CES1	-0.971046	8.69239	-5.63881	4.36051e-08	9.74518e-06		GTF2H2B	0.578749	5.77039	2.89948	0.00404915	0.0312599
	MYH11	-0.966063	15.2891	-5.39637	1.503e-07	2.0469e-05		HIST1H3H	0.576468	4.94183	3.2261	0.00141162	0.0147526
	FAM107A	-0.965058	9.10717	-6.65237	1.63043e-10	4.06025e-07		RGS11	0.575294	8.02529	3.69501	0.000266829	0.00433087
	GPR81	-0.955874	5.7652	-3.78444	0.000190316	0.00335109		FAM72D	0.575145	3.45588	4.57677	7.24751e-06	0.000267666
	SLC18A2	-0.952219	4.07437	-4.08952	5.72926e-05	0.00134781		MDH1B	0.574486	4.97683	3.67576	0.000286709	0.00457685
	EPHA5	-0.949169	5.70806	-3.74449	0.000221502	0.00375605		WDR62	0.572081	5.14165	4.18269	3.91333e-05	0.000991529
	MYOT	-0.949064	3.28787	-3.82402	0.000163547	0.00301051		FAM54A	0.563897	2.99326	4.31954	2.20834e-05	0.000638404
	C18orf34	-0.949024	3.79542	-6.06511	4.49956e-09	2.29047e-06		CCNA2	0.561582	6.3507	4.47706	1.12291e-05	0.000373561
	GSTM5	-0.948399	6.93965	-5.88039	1.22162e-08	3.82533e-06		PRSS27	0.560979	4.75822	4.10356	5.41167e-05	0.00128349
	C2orf88	-0.943407	5.54274	-5.6068	5.14637e-08	1.04554e-05		LOC286467	0.559441	2.06585	2.73842	0.00658956	0.0438265
	C20orf200	-0.931775	4.4228	-5.52131	7.98338e-08	1.36438e-05		CDT1	0.556718	6.24787	4.05671	6.5417e-05	0.0014926
	CDC42EP5	-0.929808	8.0892	-4.74826	3.35409e-06	0.000153864		SPC24	0.55265	2.65571	3.98992	8.54708e-05	0.00185084
	CACNG4	-0.929565	8.42402	-4.17901	3.9732e-05	0.00100195		LOC730668	0.551536	2.64181	3.38032	0.000832451	0.0101477
	CNTFR	-0.928503	4.70639	-5.22196	3.56994e-07	3.40061e-05		CDCA3	0.549563	5.53495	4.49972	1.01723e-05	0.000347014
	HSPB3	-0.92724	1.7603	-4.22247	3.31858e-05	0.000870068		CDCA5	0.546041	6.64328	4.84068	2.1944e-06	0.00011627
	P2RX1	-0.925117	5.99949	-4.72003	3.81339e-06	0.000168492		ORC6L	0.545644	5.03658	4.82549	2.35387e-06	0.000122106
	TRHDE	-0.925009	4.40284	-5.38946	1.556e-07	2.10264e-05		KLHL35	0.544789	4.99826	3.72099	0.000242039	0.00402982
	COL13A1	-0.922421	5.203	-5.63051	4.55228e-08	9.91941e-06		SKA1	0.533576	4.63125	4.27597	2.65377e-05	0.000733131
	SERPINA5	-0.921802	4.32501	-4.91309	1.56691e-06	9.10477e-05		E2F2	0.533505	4.72382	4.06722	6.27037e-05	0.00144539
	SYNM	-0.921089	11.8829	-5.61934	4.82316e-08	1.03525e-05		BUB1B	0.533315	6.20366	4.27284	2.68882e-05	0.000739297
	SPOCK3	-0.919411	8.8478	-5.54793	6.96678e-08	1.23923e-05		DLL3	0.52973	2.79791	2.77355	0.00593656	0.0406465
	PLP1	-0.91549	5.45834	-3.53085	0.000487912	0.00673952		TK1	0.529587	7.94067	4.64432	5.3643e-06	0.000216459
	MT1L	-0.913705	5.65211	-4.18333	3.90294e-05	0.000991529		CLSPN	0.528881	3.69624	3.40929	0.00075219	0.00938595
	CMTM5	-0.911282	2.09667	-5.93271	9.22693e-09	3.35091e-06		CENPE	0.528612	6.07689	4.56146	7.75537e-06	0.00028342
	SLC2A5	-0.900798	6.51046	-4.02553	7.41477e-05	0.00164313		C11orf82	0.526124	4.82463	5.22422	3.53068e-07	3.38729e-05
	TMEM108	-0.900581	3.38704	-6.30511	1.18981e-09	1.04634e-06		MLF1IP	0.525694	7.20642	4.87094	1.90719e-06	0.000105879
	PLAC9	-0.900504	4.52528	-4.48879	1.06692e-05	0.000358354		CDKN3	0.524193	4.92826	3.7946	0.000183076	0.00326651
	PI15	-0.899606	10.0593	-3.46651	0.000614458	0.0080475		LOC100272228	0.521218	4.91343	3.1484	0.00182834	0.0178929
	SYNPO2	-0.899339	12.3784	-5.42122	1.32642e-07	1.84977e-05		HIST1H2AM	0.520715	4.00716	3.41783	0.000729944	0.00919392
	L1CAM	-0.899279	5.15491	-4.08348	5.87119e-05	0.00137194		KIF2C	0.52043	5.78579	4.12894	4.87994e-05	0.00117985
	CNN1	-0.89601	12.2325	-5.13849	5.36033e-07	4.4093e-05		E2F1	0.520313	6.55235	4.95197	1.30564e-06	8.07089e-05
	FAM46B	-0.895096	6.55146	-5.17136	4.57001e-07	3.9634e-05		GSG2	0.519615	3.613	4.55897	7.84094e-06	0.000283575
	PRSS21	-0.894659	3.72521	-3.09918	0.00214834	0.0199741		UHRF1	0.519142	5.63621	3.88199	0.000130687	0.00255397
	MPP2	-0.891116	6.67803	-6.44047	5.53095e-10	8.40126e-07		PRR11	0.517869	3.66288	3.37065	0.000860963	0.010408
	SGCG	-0.890516	2.89809	-4.9438	1.3568e-06	8.24104e-05		DIAPH3	0.517774	4.43104	3.97594	9.03505e-05	0.00192542
	ODZ3	-0.888525	6.96374	-5.93575	9.07694e-09	3.35091e-06		XKR9	0.515561	3.87133	2.93149	0.00366623	0.0292627
	CFC1B	-0.886896	4.82801	-3.44448	0.000664412	0.00854132		NCRNA00173	0.515337	3.00284	3.03541	0.00263976	0.023182
	SORCS2	-0.884071	6.22233	-5.98423	6.98689e-09	2.89989e-06		FANCA	0.514062	5.42167	3.8679	0.000138045	0.00267082
	PRKCB	-0.880441	7.14089	-5.36205	1.78491e-07	2.32198e-05		ESCO2	0.512711	4.0852	3.71071	0.000251574	0.00414312
	CHI3L2	-0.880377	5.19738	-3.14657	0.00183945	0.0179407		VAX2	0.510922	3.92958	2.83914	0.00487202	0.0354018
	MYH6	-0.879429	1.71095	-3.00926	0.00286966	0.0246495		UBE2T	0.510836	6.07311	4.86449	1.96513e-06	0.000108406
	C1orf150	-0.878738	5.57222	-3.6373	0.000330704	0.00505671		APOBEC3B	0.510454	4.87261	3.81099	0.000171937	0.0031156
	IQSEC3	-0.876318	3.98305	-5.46055	1.08739e-07	1.57961e-05		FAM72B	0.509938	4.60473	4.33955	2.02867e-05	0.000596353
	RND2	-0.874397	5.44645	-5.96031	7.95119e-09	3.22337e-06		TACC3	0.505073	7.71831	4.74093	3.46786e-06	0.000156655
	TNMD	-0.874223	1.20535	-6.0812	4.12037e-09	2.28025e-06		SCD	0.504491	12.9299	2.93028	0.00368004	0.0293595
	CEND1	-0.873317	4.12739	-5.90067	1.09594e-08	3.74595e-06		KIF23	0.503547	5.79599	4.01941	7.59868e-05	0.00167459
	CD300LG	-0.870498	2.54162	-5.00912	9.96567e-07	6.83943e-05		CENPK	0.503148	4.12442	3.97823	8.95329e-05	0.00191033
	AOX1	-0.870435	8.10289	-5.00063	1.03755e-06	6.93032e-05		UPF0639	0.501203	1.36244	4.03589	7.11296e-05	0.00158762
	PTN	-0.870397	9.39668	-4.45931	1.21298e-05	0.000397457
	KIAA1644	-0.869459	6.55072	-4.88145	1.81622e-06	0.000101533
	SLC15A1	-0.866532	4.24293	-3.49552	0.000553993	0.00746946
	CYP3A5	-0.865347	5.03204	-3.77661	0.000196081	0.00342493
	HRASLS5	-0.865249	3.32728	-5.376	1.66457e-07	2.19824e-05
	SRL	-0.864953	5.14962	-5.19957	3.98303e-07	3.65433e-05
	MYLK	-0.864756	13.016	-5.51719	8.15269e-08	1.37917e-05
	ANGPT1	-0.862834	7.4524	-5.17281	4.53802e-07	3.9634e-05
	COL23A1	-0.861875	4.99857	-5.38727	1.5732e-07	2.10954e-05
	DES	-0.861459	13.8252	-4.5317	8.84169e-06	0.000310117
	LY6G6D	-0.860093	1.77123	-5.61748	4.86979e-08	1.03525e-05
	LPAR3	-0.859914	7.73063	-4.01344	7.78228e-05	0.00170586
	LRP1B	-0.859776	3.37099	-4.73798	3.51474e-06	0.000157876
	RPRM	-0.858003	5.50232	-5.33278	2.06542e-07	2.44928e-05
	HSD11B1	-0.856924	5.76849	-5.59037	5.60162e-08	1.09716e-05
	HSD17B6	-0.854969	9.17338	-3.8659	0.000139121	0.00267973
	MPZ	-0.854775	4.20923	-4.22152	3.3318e-05	0.000872071
	RASL12	-0.853143	8.82083	-5.99212	6.69434e-09	2.84624e-06
	ASB2	-0.852701	7.53065	-5.28217	2.65468e-07	2.82173e-05
	DGKG	-0.851542	4.24957	-5.25876	2.9796e-07	3.01979e-05
	SCIN	-0.851501	7.9674	-4.15325	4.41739e-05	0.00108917
	RPS4Y2	-0.851228	3.04888	-3.93597	0.000105803	0.00218525
	SPON1	-0.850637	8.33325	-5.49928	8.93219e-08	1.42849e-05
	NECAB1	-0.85046	5.9885	-5.92864	9.43077e-09	3.35504e-06
	MT1M	-0.849627	7.1849	-3.45932	0.000630364	0.00821878
	PITX2	-0.848037	2.45774	-3.75651	0.000211646	0.00363131
	SNAP25	-0.845273	4.81223	-5.27892	2.69753e-07	2.8499e-05
	JPH2	-0.844178	8.54222	-5.21285	3.73275e-07	3.48228e-05
	PDZRN4	-0.840176	6.98158	-5.15866	4.86092e-07	4.12669e-05
	ALDH1A2	-0.839478	7.94215	-5.17546	4.47988e-07	3.9634e-05
	EPHB1	-0.839193	4.20168	-4.5707	7.44478e-06	0.000273216
	FGF10	-0.837927	2.14829	-5.36419	1.76588e-07	2.31449e-05
	CASQ1	-0.837685	3.63675	-3.77209	0.000199481	0.00347387
	GLIS1	-0.83508	5.47645	-4.76022	3.17601e-06	0.000148789
	TNFRSF19	-0.833396	9.44289	-4.44654	1.282e-05	0.000413083
	WFDC2	-0.832404	8.20951	-3.21787	0.0014512	0.015068
	SCN2B	-0.828681	4.49552	-5.11086	6.12536e-07	4.76301e-05
	KRT14	-0.828421	8.00084	-3.27003	0.00121687	0.0131836
	MYOM1	-0.827384	6.15038	-4.63963	5.47823e-06	0.000220038
	GPM6A	-0.826817	5.73273	-4.34318	1.99759e-05	0.000590567
	LYVE1	-0.824396	4.78327	-4.71771	3.85369e-06	0.000169213
	MT1H	-0.824217	4.83576	-3.92724	0.000109497	0.00225259
	FBLN1	-0.823314	11.9932	-5.79608	1.91288e-08	5.46644e-06
	C4orf31	-0.822898	7.20106	-4.67715	4.62896e-06	0.000193971
	FBXL21	-0.82279	1.05864	-5.34307	1.96219e-07	2.40879e-05
	GDF10	-0.820612	2.67185	-4.66438	4.90272e-06	0.000202522
	NRG2	-0.819924	3.85841	-4.62007	5.9787e-06	0.000233156
	ATRNL1	-0.819615	5.76027	-4.92813	1.46034e-06	8.70445e-05
	FXYD6	-0.818955	8.88867	-6.14529	2.89689e-09	1.84479e-06
	SLC38A5	-0.817768	5.12349	-5.4741	1.01522e-07	1.51259e-05
	ASB5	-0.81661	6.20147	-4.35378	1.90952e-05	0.000569979
	ZNF536	-0.815411	3.82448	-4.53223	8.82121e-06	0.000310023
	PHYHD1	-0.814696	7.87293	-3.63204	0.000337198	0.0051247
	KCNMB1	-0.811265	8.82783	-5.24665	3.16258e-07	3.18672e-05
	FAIM2	-0.810954	7.55131	-5.0105	9.9007e-07	6.8217e-05
	FOSL1	-0.810685	4.69612	-3.33125	0.000986857	0.0113326
	ACSS3	-0.810307	6.33907	-4.98662	1.10872e-06	7.32092e-05
	KL	-0.809465	7.94542	-3.43608	0.000684457	0.00871545
	MYL9	-0.808159	13.418	-5.22388	3.53653e-07	3.38729e-05
	CSF3	-0.807086	2.61558	-2.93552	0.00362044	0.0289679
	SGCA	-0.806026	6.84823	-5.05199	8.12546e-07	5.92649e-05
	CYTL1	-0.805008	4.69167	-5.10413	6.32731e-07	4.81649e-05
	KCNB1	-0.80438	4.61958	-5.17163	4.56408e-07	3.9634e-05
	PTGIS	-0.801793	8.99051	-5.18336	4.31075e-07	3.87345e-05
	GFRA3	-0.801723	4.01541	-3.61401	0.000360366	0.00539682
	CCL14	-0.80108	8.04227	-4.68019	4.56591e-06	0.000192254
	MASP1	-0.80102	8.99491	-4.13848	4.69308e-05	0.00114579
	HAPLN2	-0.800359	3.52196	-5.33727	2.01972e-07	2.42137e-05
	GNG4	-0.800259	9.78634	-4.45621	1.22941e-05	0.000401197
	F10	-0.800186	6.49268	-5.99295	6.66427e-09	2.84624e-06
	KCNQ2	-0.798821	3.71698	-2.83149	0.00498649	0.0359787
	CRIP3	-0.798813	2.93199	-4.43524	1.34627e-05	0.00042982
	FLNA	-0.798692	14.5781	-5.48103	9.80079e-08	1.47898e-05
	LMOD1	-0.79854	11.279	-5.02451	9.26275e-07	6.56375e-05
	GSTM2	-0.797476	7.93236	-5.07414	7.30799e-07	5.42097e-05
	LCN10	-0.79734	4.11323	-4.57515	7.2998e-06	0.000269028
	SCGB1D2	-0.796124	4.61251	-2.76416	0.00610505	0.0413134
	TRPC4	-0.79461	6.00759	-5.33745	2.0179e-07	2.42137e-05
	FLRT2	-0.792745	7.52561	-5.12412	5.746e-07	4.57371e-05
	KANK4	-0.789879	4.82081	-4.53899	8.56279e-06	0.000301548
	SLC22A3	-0.789309	9.67409	-3.50367	0.000538057	0.00728869
	ABO	-0.788223	3.8035	-3.52658	0.000495476	0.00681362
	PAK3	-0.786636	2.76857	-5.13037	5.57498e-07	4.49922e-05
	LMO3	-0.785565	6.57155	-4.69059	4.35663e-06	0.000185231
	MAMDC2	-0.781168	6.28367	-5.35256	1.87149e-07	2.3813e-05
	FHL1	-0.780836	11.059	-4.82973	2.30831e-06	0.000120836
	TPM2	-0.779781	12.6394	-5.0652	7.6278e-07	5.63423e-05
	CES4	-0.777708	2.93202	-4.02068	7.55998e-05	0.00167029
	CNTN1	-0.777144	7.74828	-4.24643	3.0033e-05	0.00080544
	HAAO	-0.776893	6.26983	-5.26671	2.86507e-07	2.95527e-05
	EYA1	-0.775622	6.88382	-4.51511	9.50966e-06	0.000329567
	RAB40A	-0.775117	3.45714	-5.639	4.35617e-08	9.74518e-06
	PLCL1	-0.774712	7.18707	-4.82423	2.36759e-06	0.000122106
	SLC27A6	-0.77466	5.6977	-3.46789	0.000611429	0.00801988
	BHMT2	-0.77343	6.03321	-5.23063	3.42142e-07	3.32759e-05
	PDK4	-0.773084	9.86023	-4.34339	1.99586e-05	0.000590567
	SCUBE3	-0.772063	5.09047	-5.10816	6.20583e-07	4.76301e-05
	ADAM33	-0.767847	6.90951	-4.69735	4.22579e-06	0.000180993
	FAM196A	-0.766054	2.91844	-5.48837	9.44204e-08	1.46959e-05
	SLITRK4	-0.765122	4.69962	-3.17829	0.00165613	0.0166652
	HECW1	-0.764902	4.44811	-3.60701	0.000369745	0.00550248
	CACNG1	-0.764879	2.48202	-3.89942	0.000122102	0.00242424
	GSTT2	-0.76326	7.53687	-2.92407	0.00375188	0.0297242
	PRDM8	-0.761708	7.74864	-3.99515	8.37121e-05	0.00181954
	SCN4A	-0.761497	2.01659	-4.35444	1.90414e-05	0.000569979
	MAMLD1	-0.761329	6.08104	-6.36661	8.4127e-10	1.04634e-06
	DACH2	-0.759852	2.40461	-3.02994	0.00268644	0.0233683
	PRIMA1	-0.75919	6.05059	-4.4445	1.29336e-05	0.000415976
	FMOD	-0.758941	11.7987	-4.10121	5.46376e-05	0.00129057
	ELMOD1	-0.758274	1.78902	-5.50981	8.46552e-08	1.37917e-05
	NEGR1	-0.756031	6.82711	-5.12253	5.79012e-07	4.58788e-05
	SCARA5	-0.755643	3.58872	-3.30555	0.00107799	0.0121314
	NLGN3	-0.754117	6.93404	-5.58438	5.77708e-08	1.11896e-05
	TCEAL2	-0.753203	6.9338	-4.50702	9.85265e-06	0.000338424
	H19	-0.751871	6.73995	-2.78813	0.00568313	0.0394491
	GPX3	-0.750807	10.011	-4.95874	1.2647e-06	7.93028e-05
	EGR3	-0.750494	7.99278	-3.15467	0.0017909	0.0176179
	ADCY5	-0.749939	7.72864	-4.85675	2.03699e-06	0.000110965
	RAB9B	-0.747967	3.7925	-5.73562	2.63095e-08	7.0558e-06
	CHRDL2	-0.747715	6.21036	-3.43117	0.000696412	0.00882898
	ASAM	-0.747367	5.66653	-5.13505	5.45017e-07	4.4396e-05
	IL6	-0.747212	4.52371	-2.70092	0.00735784	0.0469651
	CAV1	-0.747052	10.0418	-5.91724	1.00271e-08	3.49585e-06
	EYA4	-0.746534	6.07332	-4.6079	6.31168e-06	0.000240755
	LOC284276	-0.746142	3.90283	-5.23128	3.41056e-07	3.32759e-05
	ACTA2	-0.743798	13.8385	-5.14094	5.29704e-07	4.39705e-05
	SORBS1	-0.742947	11.0263	-4.92418	1.48762e-06	8.82046e-05
	PPARGC1A	-0.742763	5.88589	-4.22636	3.26543e-05	0.000861414
	LRCH2	-0.742342	7.14793	-4.84167	2.18439e-06	0.000116092
	ESPNL	-0.742308	3.23606	-4.49651	1.03161e-05	0.000349184
	SH3RF2	-0.742264	7.06578	-4.7596	3.18497e-06	0.000148789
	CFD	-0.7415	7.74049	-4.39815	1.57947e-05	0.000489536
	MAB21L1	-0.74006	3.4655	-3.64664	0.00031947	0.00493706
	TSPAN18	-0.739699	8.15026	-5.88944	1.16384e-08	3.82533e-06
	B3GALT2	-0.738831	5.27737	-4.55071	8.13206e-06	0.000291294
	PCYT1B	-0.735124	4.01933	-4.61482	6.12021e-06	0.000234994
	GNAL	-0.73468	6.57516	-4.92773	1.46306e-06	8.70445e-05
	COX7A1	-0.73346	6.8423	-5.16781	4.64965e-07	3.99343e-05
	LPHN3	-0.733121	4.34117	-4.20934	3.50463e-05	0.000909117
	C8orf84	-0.7329	6.61209	-4.94545	1.34631e-06	8.22976e-05
	OLFML1	-0.731038	7.14798	-5.63303	4.49327e-08	9.91476e-06
	MYOZ2	-0.730527	1.67713	-3.07546	0.00232034	0.0210997
	CYP4F12	-0.729111	4.62717	-3.36703	0.000871859	0.0105105
	ISM2	-0.728449	4.47592	-3.59735	0.000383081	0.00565281
	ZNF804A	-0.727296	4.01725	-4.93372	1.42254e-06	8.61031e-05
	PGR	-0.727248	7.25403	-4.63629	5.56061e-06	0.00022253
	LRRC2	-0.726115	4.00421	-4.28923	2.50983e-05	0.000703397
	TSLP	-0.724706	5.11876	-4.66859	4.81076e-06	0.000199195
	PCSK2	-0.723965	2.90727	-3.6191	0.000353671	0.00533414
	ARHGAP20	-0.722945	6.03445	-4.98474	1.11862e-06	7.35841e-05
	MYOZ3	-0.722888	4.9859	-4.66144	4.96786e-06	0.000203462
	CHRNA2	-0.722768	10.721	-3.74275	0.000222966	0.00376988
	GCOM1	-0.722741	7.80309	-5.52645	7.77623e-08	1.34213e-05
	SERP2	-0.721371	4.9801	-4.7591	3.19224e-06	0.000148789
	ASTN1	-0.720721	2.96568	-3.61361	0.000360888	0.0054
	FGF2	-0.720527	7.48979	-5.46729	1.05087e-07	1.55244e-05
	MAOB	-0.719811	9.76066	-3.85441	0.000145451	0.00276951
	CRYAB	-0.718332	9.0145	-4.78963	2.77599e-06	0.000137085
	GNAO1	-0.717388	6.95863	-5.01336	9.76714e-07	6.81411e-05
	ANO7	-0.71493	10.8951	-3.73039	0.000233618	0.00391579
	AOC3	-0.71422	10.3799	-5.70696	3.05748e-08	7.72435e-06
	PDE1C	-0.712563	2.2202	-3.98276	8.79389e-05	0.00189253
	AHNAK2	-0.711558	9.01273	-4.84314	2.16953e-06	0.000115655
	TMEM158	-0.711158	7.31471	-5.68446	3.43888e-08	8.21187e-06
	MRVI1	-0.710953	9.73229	-5.00031	1.0391e-06	6.93032e-05
	PIPOX	-0.710491	4.51472	-5.33645	2.028e-07	2.42137e-05
	FOXF1	-0.70981	8.15284	-5.10736	6.22973e-07	4.76301e-05
	WDR17	-0.709507	4.51197	-3.47754	0.000590766	0.00783732
	HS3ST3A1	-0.708555	5.03549	-5.13841	5.36239e-07	4.4093e-05
	AQP5	-0.708553	2.48794	-4.06696	6.27675e-05	0.00144539
	C1QL1	-0.708419	2.68654	-4.18836	3.82269e-05	0.000977083
	EMX2OS	-0.708065	3.18392	-3.58819	0.000396147	0.00578846
	LRFN5	-0.706982	5.01971	-4.41654	1.45936e-05	0.000459198
	SYN2	-0.706922	3.96879	-4.03964	7.00684e-05	0.00156594
	ITGB3	-0.706728	6.55511	-5.12664	5.67627e-07	4.53893e-05
	GALNT13	-0.705113	4.36399	-3.12507	0.0019741	0.0187279
	HMGCS2	-0.704963	9.63958	-2.79582	0.00555351	0.038879
	RXRG	-0.704441	1.84681	-4.70126	4.15176e-06	0.000179571
	NPY6R	-0.703733	2.44382	-3.56888	0.000425067	0.00608856
	ATP2B4	-0.70315	10.594	-5.32717	2.12381e-07	2.46672e-05
	KCTD14	-0.7023	6.1586	-4.10801	5.31456e-05	0.00126562
	CAMK1G	-0.702085	4.27058	-4.70364	4.10724e-06	0.000178993
	DCHS2	-0.701708	4.00066	-4.37801	1.72189e-05	0.000523838
	KCNAB1	-0.70131	7.3145	-4.43334	1.35734e-05	0.000432562
	COL14A1	-0.699932	9.80791	-4.76914	3.04923e-06	0.000145388
	KCNS2	-0.699174	2.01513	-5.21009	3.78359e-07	3.50827e-05
	ITGA9	-0.698527	7.24281	-4.61741	6.04981e-06	0.000234356
	TGFB3	-0.698372	9.44786	-5.01179	9.84028e-07	6.8217e-05
	ATCAY	-0.698008	5.59959	-3.44365	0.00066636	0.00854746
	KLHL14	-0.697745	4.05676	-4.77991	2.90257e-06	0.00014173
	LEPREL1	-0.696878	9.51168	-2.98561	0.00309328	0.0259377
	C10orf72	-0.696661	8.56704	-5.39758	1.49387e-07	2.0469e-05
	CCND2	-0.696387	9.50154	-5.32463	2.15088e-07	2.46672e-05
	CLIC6	-0.696155	7.15275	-4.49666	1.03093e-05	0.000349184
	PDE5A	-0.695751	10.1241	-4.70784	4.02991e-06	0.000176064
	ZNF655	-0.695372	8.73481	-4.55336	8.03741e-06	0.000290079
	SNAI2	-0.692598	7.37513	-4.49789	1.02539e-05	0.000349113
	MYBPC1	-0.69236	11.0946	-2.97401	0.00320866	0.0265213
	LOC255167	-0.691697	4.53469	-3.8827	0.000130329	0.00254983
	LDHB	-0.691291	11.2325	-5.11395	6.03485e-07	4.73871e-05
	HS6ST2	-0.690045	5.65248	-2.93547	0.00362098	0.0289679
	HLF	-0.689569	8.24762	-5.32182	2.18109e-07	2.46888e-05
	ANKRD45	-0.689277	2.86147	-5.26037	2.95602e-07	3.01341e-05
	SMTNL2	-0.688578	3.13799	-3.83039	0.000159583	0.00297843
	RBM24	-0.688104	6.60483	-3.74311	0.000222662	0.00376839
	MYOM2	-0.687969	5.64415	-4.14323	4.60281e-05	0.0011285
	MCF2	-0.686702	2.10356	-4.6782	4.60696e-06	0.000193514
	RNF175	-0.686616	3.09668	-4.58865	6.87562e-06	0.00025831
	LOC643763	-0.686458	2.85723	-4.59759	6.60802e-06	0.000249872
	CPXM1	-0.68609	6.56037	-3.75069	0.000216362	0.00367962
	EPHB6	-0.685087	9.48199	-4.77645	2.94883e-06	0.000143167
	HPD	-0.684912	2.41647	-3.82537	0.000162702	0.00300697
	S100B	-0.684093	4.44484	-3.68887	0.000273019	0.00441082
	C3orf70	-0.684081	7.5137	-5.14751	5.13102e-07	4.30019e-05
	BAI3	-0.683847	2.76008	-4.67438	4.68691e-06	0.00019546
	RGS7BP	-0.683837	5.60021	-4.55997	7.80659e-06	0.00028342
	CRTAC1	-0.68328	4.38316	-3.81794	0.000167411	0.00306867
	TAGLN	-0.68297	14.1962	-4.63994	5.47051e-06	0.000220038
	CILP	-0.682799	5.53552	-4.95224	1.30401e-06	8.07089e-05
	PNCK	-0.682722	6.64864	-4.58022	7.1375e-06	0.00026529
	ANO5	-0.681592	6.43329	-3.72193	0.00024118	0.00401936
	ITIH5	-0.680546	9.22803	-5.28891	2.56759e-07	2.7459e-05
	XKR5	-0.680184	3.18653	-4.95657	1.27769e-06	7.98304e-05
	SEMA3A	-0.679872	4.84042	-4.20883	3.51213e-05	0.00090971
	DAAM2	-0.678373	8.36987	-4.63211	5.66561e-06	0.000224461
	NTRK1	-0.677779	2.84708	-4.35059	1.93562e-05	0.000576149
	TMEM90B	-0.677299	4.86108	-4.28938	2.50821e-05	0.000703397
	PAPPA	-0.677117	5.1031	-5.08373	6.97938e-07	5.19934e-05
	NOS1	-0.676799	3.45459	-3.13713	0.00189748	0.0182846
	NEXN	-0.676576	9.10198	-4.61821	6.02839e-06	0.000234152
	NR4A3	-0.676465	7.36313	-2.73432	0.00666996	0.0440631
	SPEG	-0.674857	8.34866	-4.30326	2.36568e-05	0.000673831
	PTGER2	-0.674802	6.74532	-4.94821	1.32895e-06	8.18593e-05
	SLC8A1	-0.674248	8.77396	-4.65751	5.0562e-06	0.000206407
	C2	-0.673544	8.80742	-5.04057	8.58077e-07	6.15556e-05
	LRRN3	-0.673045	4.1823	-3.86399	0.000140154	0.00269665
	SERPINF1	-0.672206	10.3466	-4.76943	3.04519e-06	0.000145388
	LOC389493	-0.672134	4.65944	-2.99988	0.00295654	0.0252315
	FAT4	-0.670042	7.65344	-4.80155	2.6282e-06	0.000133775
	FST	-0.66947	5.67063	-4.12569	4.94503e-05	0.00119228
	HRH2	-0.669394	4.0102	-5.34445	1.94878e-07	2.40879e-05
	ADAMTS5	-0.668569	6.49054	-4.37459	1.74725e-05	0.000529706
	TGFB1I1	-0.667826	9.21558	-5.06251	7.72653e-07	5.6592e-05
	NMUR1	-0.667653	4.33033	-4.75127	3.30834e-06	0.000152166
	GPR133	-0.667635	6.54686	-4.1406	4.65266e-05	0.00113752
	TSPAN11	-0.667488	6.44572	-4.42288	1.42002e-05	0.000448764
	SLC7A14	-0.667263	1.58942	-4.35697	1.88377e-05	0.000565195
	C10orf116	-0.666562	10.5264	-3.27022	0.0012161	0.0131836
	FMN2	-0.664871	4.52987	-4.02541	7.41821e-05	0.00164313
	ATP1B2	-0.66432	6.12564	-5.04174	8.5329e-07	6.14651e-05
	TMEM100	-0.663405	5.80033	-3.97847	8.94468e-05	0.00191033
	CKMT2	-0.662998	5.27823	-4.22636	3.26536e-05	0.000861414
	EMILIN3	-0.662526	6.81468	-5.22976	3.43602e-07	3.32759e-05
	ASXL3	-0.662391	4.06105	-4.43926	1.32308e-05	0.000423969
	SCARA3	-0.662172	8.9626	-5.13546	5.43946e-07	4.4396e-05
	GIPC2	-0.661964	4.7194	-5.10043	6.44105e-07	4.88175e-05
	C16orf89	-0.661741	5.0651	-3.46831	0.000610533	0.00801416
	CDO1	-0.661529	6.87666	-2.72188	0.00691908	0.0452012
	STAC2	-0.658859	4.85475	-2.67805	0.00786519	0.049054
	EFCAB4B	-0.657892	7.26366	-2.94504	0.00351425	0.0283876
	LTBP4	-0.657364	11.9438	-5.27641	2.73124e-07	2.85096e-05
	KNDC1	-0.657288	4.62562	-3.7864	0.000188901	0.00333292
	ABCA8	-0.657145	7.63409	-4.04342	6.90117e-05	0.00155428
	RGS22	-0.656656	3.87297	-4.67235	4.73005e-06	0.000196788
	CORO2B	-0.656316	4.99655	-5.277	2.72323e-07	2.85096e-05
	HHIP	-0.655519	6.08628	-3.20823	0.00149881	0.0154416
	ITM2A	-0.654699	7.75279	-4.05798	6.50832e-05	0.00149057
	MLC1	-0.654632	3.83024	-3.10129	0.00213363	0.0198895
	SDPR	-0.654089	9.06352	-4.97531	1.1696e-06	7.57938e-05
	CTF1	-0.653932	6.44133	-4.72555	3.71894e-06	0.000165379
	TMEM200C	-0.653719	1.69289	-5.43059	1.26517e-07	1.77858e-05
	RSPO1	-0.653397	4.6139	-4.27082	2.71178e-05	0.000744437
	FOXF2	-0.652765	6.18675	-3.71585	0.000246763	0.00409673
	IGF2	-0.652311	8.2742	-3.85301	0.000146241	0.00278002
	OR2W3	-0.652266	3.3302	-4.10308	5.42224e-05	0.00128425
	SOCS3	-0.65226	9.92936	-3.07461	0.00232679	0.0211363
	CLIP3	-0.652244	8.68444	-5.31511	2.25505e-07	2.53613e-05
	TRIM9	-0.652091	3.07967	-5.31237	2.28585e-07	2.55429e-05
	KBTBD10	-0.651828	5.12	-3.09852	0.00215302	0.0199741
	ROR2	-0.651624	8.24305	-4.06485	6.33045e-05	0.00145584
	C7orf58	-0.651555	8.75368	-4.2547	2.90118e-05	0.00078482
	CAMK2A	-0.651362	2.58987	-3.96719	9.35401e-05	0.00196931
	RGN	-0.650306	6.22331	-4.24738	2.99141e-05	0.000803487
	WFIKKN2	-0.650295	3.10498	-5.04333	8.46841e-07	6.12537e-05
	FKBP1B	-0.649584	6.66097	-3.75816	0.000210323	0.00361787
	CCDC85A	-0.649431	4.96982	-5.35575	1.84195e-07	2.36095e-05
	ACER1	-0.648939	2.62317	-3.66569	0.000297672	0.00470386
	DCHS1	-0.648831	9.34232	-5.34117	1.98087e-07	2.41472e-05
	MSRB3	-0.648131	9.91485	-4.91792	1.53189e-06	8.96105e-05
	EMX2	-0.648131	2.17845	-3.60465	0.000372961	0.00553315
	PMP2	-0.646764	3.19012	-3.18609	0.00161373	0.016336
	ZNF423	-0.646399	7.31046	-5.32503	2.14656e-07	2.46672e-05
	LDLRAD1	-0.645812	2.62963	-2.83681	0.0049066	0.0355494
	KIAA0408	-0.64502	5.57145	-2.77486	0.00591337	0.0405783
	LOC644538	-0.644308	6.28684	-5.21616	3.67288e-07	3.46084e-05
	APOBEC3C	-0.644249	6.98069	-4.179	3.97333e-05	0.00100195
	TMLHE	-0.64398	5.07116	-4.68238	4.52114e-06	0.000190829
	GPM6B	-0.643783	7.83078	-5.85686	1.38515e-08	4.09253e-06
	TNNC2	-0.643765	2.69712	-3.45885	0.000631418	0.00822637
	TWIST2	-0.643127	4.8164	-4.15038	4.4697e-05	0.00110051
	MAP1A	-0.64279	8.13434	-4.84383	2.16259e-06	0.000115639
	DMKN	-0.642342	6.44248	-3.23527	0.00136873	0.0144429
	KCNQ5	-0.64195	4.75742	-4.13179	4.8234e-05	0.00116942
	RARRES2	-0.641857	8.88483	-4.63493	5.59469e-06	0.00022253
	SLC38A11	-0.641734	7.49276	-2.78992	0.00565281	0.0393333
	LIMS2	-0.641554	9.54286	-4.91095	1.58271e-06	9.16603e-05
	SERPINF2	-0.641519	7.84867	-4.24437	3.02917e-05	0.00081113
	GPR124	-0.641447	10.7923	-5.08513	6.93275e-07	5.18677e-05
	TCF21	-0.640548	8.23251	-3.98756	8.62777e-05	0.00186138
	STARD8	-0.640285	7.2828	-5.55264	6.8005e-08	1.22213e-05
	SSTR2	-0.639248	4.05975	-4.71199	3.95483e-06	0.000173218
	DCN	-0.639066	11.5838	-4.33619	2.05779e-05	0.000602882
	NIPAL4	-0.638916	3.44455	-3.79081	0.000185746	0.00329391
	CLU	-0.638908	12.3313	-4.90381	1.63638e-06	9.44549e-05
	BCHE	-0.637775	5.59372	-3.39625	0.000787373	0.00971507
	OXER1	-0.637469	4.61312	-4.43715	1.33519e-05	0.000427066
	JAM3	-0.637174	9.71901	-5.59085	5.58766e-08	1.09716e-05
	ADAMTS8	-0.637028	6.52415	-4.76161	3.15591e-06	0.000148789
	GABRQ	-0.636831	1.61431	-4.00866	7.93202e-05	0.00173055
	CH25H	-0.636686	5.51745	-3.57538	0.000415119	0.00599036
	FBXO17	-0.636483	6.93342	-4.2945	2.45467e-05	0.000690159
	MRGPRF	-0.636419	8.73829	-4.38428	1.67625e-05	0.000511741
	PCDH18	-0.636298	8.22079	-4.91926	1.52229e-06	8.93488e-05
	RBMS3	-0.635894	4.6743	-4.41119	1.49338e-05	0.000465699
	ITGB1BP2	-0.635637	4.3256	-4.29509	2.44861e-05	0.000690159
	IGF1	-0.635289	9.21726	-3.1423	0.00186551	0.0181269
	PCP4	-0.635113	8.79311	-3.33256	0.000982413	0.0113039
	NELL2	-0.634917	7.13526	-3.58617	0.000399078	0.00581666
	GLDN	-0.633678	3.36919	-4.01954	7.59468e-05	0.00167459
	CETP	-0.633485	2.90859	-3.86694	0.000138561	0.00267782
	PHYHIP	-0.633384	6.1448	-3.9902	8.53759e-05	0.00185084
	ZNF826	-0.632977	3.5203	-4.26502	2.77844e-05	0.000755598
	CELF2	-0.632951	8.70389	-5.10866	6.19086e-07	4.76301e-05
	SYT10	-0.632748	1.80156	-4.11438	5.17865e-05	0.0012409
	FAM124A	-0.63218	5.39054	-5.13251	5.51768e-07	4.47369e-05
	HAPLN4	-0.631819	2.15693	-4.4671	1.17262e-05	0.000387878
	NAT1	-0.631649	6.34659	-3.03798	0.0026181	0.0230615
	PNMT	-0.631329	2.19512	-3.86935	0.000137272	0.00266143
	CCL23	-0.63095	3.21421	-3.54132	0.000469784	0.00656192
	CSPG4	-0.630077	8.71463	-4.82811	2.32553e-06	0.000121373
	psiTPTE22	-0.629987	5.88109	-3.0098	0.00286469	0.0246239
	TRIM58	-0.629529	6.66021	-3.13324	0.00192191	0.0184081
	PDE6B	-0.629237	4.85774	-3.65245	0.000312666	0.00486208
	PRDM6	-0.628506	4.56548	-4.28508	2.55403e-05	0.000713492
	FABP3	-0.628012	7.30798	-4.29521	2.44737e-05	0.000690159
	COL4A4	-0.626866	7.08084	-4.38944	1.63959e-05	0.00050231
	LOC399959	-0.626563	7.74434	-4.67658	4.64078e-06	0.000194
	EMILIN1	-0.625912	10.6123	-4.85567	2.04726e-06	0.000111177
	NKAPL	-0.625857	2.90077	-4.9546	1.2896e-06	8.02867e-05
	WFDC1	-0.625577	8.68122	-4.17479	4.04294e-05	0.00101405
	MEIS2	-0.625197	8.72855	-4.3105	2.29444e-05	0.000656761
	CSRP1	-0.625176	13.452	-5.22987	3.4341e-07	3.32759e-05
	CDH19	-0.624559	3.15895	-2.89721	0.00407769	0.0314107
	CORIN	-0.623338	6.07172	-3.34997	0.000925041	0.0109696
	MMP16	-0.622472	4.0417	-4.05746	6.52208e-05	0.00149057
	TGFBR3	-0.620439	9.21885	-5.51042	8.43939e-08	1.37917e-05
	CTSG	-0.62009	3.31332	-2.81843	0.00518774	0.0369717
	NRXN1	-0.620082	4.80997	-2.99638	0.00298954	0.0253965
	PDE2A	-0.619546	7.38648	-4.66289	4.93553e-06	0.000203395
	RIMS4	-0.618773	5.0747	-3.42634	0.000708379	0.00896115
	GSTP1	-0.618364	9.97083	-4.26542	2.77383e-05	0.000755522
	DRD1	-0.618247	3.99057	-3.778	0.000195043	0.00341716
	HSPB7	-0.617942	7.94261	-3.79999	0.000179339	0.0032064
	TACR2	-0.61731	5.09012	-4.21691	3.39619e-05	0.000882302
	INMT	-0.6168	8.59874	-4.69591	4.25332e-06	0.000181725
	C1QTNF1	-0.616666	8.83945	-4.87823	1.84359e-06	0.000102676
	KCNIP1	-0.615904	3.2891	-4.5429	8.4169e-06	0.000298218
	QPRT	-0.615729	5.58472	-4.45805	1.2196e-05	0.000398877
	PKNOX2	-0.614807	7.59053	-4.32407	2.16639e-05	0.000630764
	ANKRD35	-0.61434	6.28578	-4.31706	2.23167e-05	0.00064408
	EDNRB	-0.614313	8.0837	-4.03303	7.19525e-05	0.00160189
	DYNC1I1	-0.614268	6.38939	-4.5819	7.08453e-06	0.000263884
	DUSP15	-0.614202	3.85891	-4.28001	2.6091e-05	0.000725389
	EPHA3	-0.613714	9.42934	-4.3086	2.31294e-05	0.000660971
	LPAR1	-0.613424	7.6006	-4.78642	2.81722e-06	0.000138468
	ZCCHC12	-0.613367	2.66161	-4.1054	5.37132e-05	0.00127565
	PCOLCE2	-0.613333	7.10597	-3.70868	0.000253496	0.00416882
	ITGA5	-0.612725	10.4071	-4.89652	1.69305e-06	9.62851e-05
	SCG5	-0.611539	5.01119	-3.48135	0.000582789	0.00775509
	SLC47A1	-0.610796	5.38366	-4.2435	3.04028e-05	0.000811611
	CACNA2D3	-0.610511	3.7903	-3.94526	0.000102002	0.00211678
	GPR3	-0.609038	3.32446	-3.98464	8.72839e-05	0.00188076
	TMEM200B	-0.608953	7.19624	-3.91359	0.000115521	0.00234159
	TCEAL7	-0.608453	5.33979	-4.8616	1.99166e-06	0.00010941
	HEPH	-0.607979	8.27954	-4.52072	9.27835e-06	0.000323481
	DIO3	-0.60756	4.28715	-4.61811	6.03111e-06	0.000234152
	DDIT4L	-0.60747	4.7847	-3.11924	0.00201221	0.0189809
	DNAJB5	-0.607435	8.41838	-5.38412	1.59821e-07	2.12672e-05
	HPCAL4	-0.60644	2.00482	-4.33202	2.09456e-05	0.000612623
	EFCAB1	-0.605604	4.82682	-3.27197	0.00120887	0.013146
	SPIB	-0.605465	4.03535	-2.76886	0.00602013	0.0408975
	CRHBP	-0.605444	3.48634	-3.83767	0.000155169	0.00291162
	ZNF727	-0.60541	2.86322	-3.22029	0.00143944	0.0149804
	CPEB1	-0.605338	3.39223	-3.86599	0.00013907	0.00267973
	ADH1B	-0.605273	5.42056	-3.20582	0.00151094	0.0155524
	PTH1R	-0.605006	4.11065	-4.0442	6.87951e-05	0.00155341
	PPP1R1C	-0.60392	1.36127	-3.56597	0.000429596	0.00612825
	TNS1	-0.603798	12.6086	-4.39115	1.62765e-05	0.000499529
	LSAMP	-0.603607	7.53905	-3.34514	0.000940646	0.0110468
	MYOZ1	-0.60358	4.08489	-3.27826	0.0011833	0.0129732
	NID2	-0.603281	7.46545	-5.19386	4.09569e-07	3.73802e-05
	KCNIP3	-0.603115	6.17331	-4.99844	1.04837e-06	6.94872e-05
	WNT2	-0.603092	5.65275	-2.82066	0.00515283	0.0368158
	VANGL2	-0.602473	8.82098	-3.74214	0.000223477	0.00377485
	HHATL	-0.602199	1.29186	-3.45829	0.000632664	0.00823029
	C2orf40	-0.60209	7.18867	-3.39459	0.000791956	0.00974268
	IL33	-0.601779	8.45359	-4.75738	3.21745e-06	0.000149166
	FAM196B	-0.601172	1.68368	-3.67645	0.000285976	0.00456933
	KLHL4	-0.600597	2.56124	-4.80547	2.58128e-06	0.000131956
	PIK3C2G	-0.599102	1.73443	-3.19838	0.00154898	0.0157813
	LOC728264	-0.598362	8.21721	-3.83986	0.000153868	0.0028905
	FAM86B2	-0.598193	2.88846	-3.7318	0.000232378	0.00390251
	BOC	-0.597848	9.32339	-4.91622	1.54414e-06	9.00248e-05
	NCAPD3	-0.596737	12.1738	-3.0492	0.00252549	0.0224729
	PRICKLE2	-0.596258	8.09295	-4.84854	2.11599e-06	0.000114016
	C1QTNF7	-0.595981	6.63052	-3.80883	0.000173366	0.00312525
	CTSW	-0.595683	4.93969	-3.15479	0.0017902	0.0176179
	ELANE	-0.595586	1.59039	-4.73645	3.53927e-06	0.000158196
	TCF7	-0.594981	7.44075	-4.71977	3.81793e-06	0.000168492
	ABI3BP	-0.594549	7.47504	-3.96439	9.45805e-05	0.00198881
	B3GAT1	-0.594285	8.96262	-3.27394	0.0012008	0.0131218
	GALM	-0.594169	8.46565	-4.04844	6.76331e-05	0.00153313
	DSCAML1	-0.593753	2.3233	-5.0076	1.00379e-06	6.86199e-05
	DPYSL5	-0.593599	2.35511	-2.69126	0.00756848	0.0478329
	GPIHBP1	-0.593516	4.24516	-3.80471	0.000176127	0.00316337
	GFPT2	-0.593314	7.02767	-4.77349	2.98903e-06	0.000144335
	SCHIP1	-0.592947	6.8597	-4.63502	5.59239e-06	0.00022253
	DBC1	-0.592134	5.12118	-2.93971	0.00357331	0.0287183
	FOXP2	-0.59132	4.26739	-3.57682	0.000412948	0.00597053
	SFRP1	-0.590814	10.5285	-3.91792	0.000113577	0.00231293
	FRMD6	-0.590575	9.21297	-4.79888	2.66066e-06	0.000134048
	DUSP26	-0.589362	4.62664	-3.50804	0.000529678	0.00719669
	VWA5A	-0.589121	8.0835	-4.49655	1.03139e-05	0.000349184
	PTPLA	-0.589092	6.0252	-4.79555	2.70166e-06	0.000135722
	ITGA8	-0.588944	7.73548	-2.80622	0.00538244	0.0379558
	NAALADL1	-0.588627	5.39322	-5.00279	1.02697e-06	6.91203e-05
	GZMK	-0.588586	5.45471	-3.31345	0.00104915	0.0118836
	CCDC80	-0.588284	9.66577	-4.11387	5.1894e-05	0.0012409
	GREM2	-0.587875	7.40029	-3.30228	0.00109011	0.0122126
	FHOD3	-0.587405	8.66102	-4.79364	2.7254e-06	0.000135813
	AJAP1	-0.587374	3.94153	-3.88402	0.000129661	0.00254532
	GPRASP1	-0.5872	8.39627	-5.16063	4.81464e-07	4.11415e-05
	DDR2	-0.586665	7.11083	-3.66542	0.000297969	0.00470386
	PABPC1L2A	-0.5866	5.68642	-2.78461	0.00574335	0.0397136
	PRTFDC1	-0.58651	5.39746	-4.78621	2.81988e-06	0.000138468
	ITGA7	-0.586288	9.1714	-4.49404	1.04277e-05	0.000352278
	ABCG2	-0.586089	7.44477	-4.66214	4.95211e-06	0.000203462
	LRRK2	-0.586089	6.52356	-4.12683	4.92201e-05	0.00118837
	KIAA1614	-0.585977	5.07702	-5.00573	1.01272e-06	6.89598e-05
	GNG2	-0.585889	7.33849	-5.15211	5.01795e-07	4.22575e-05
	ANK2	-0.585823	7.14654	-3.7616	0.000207592	0.00357584
	MEIS1	-0.585789	7.94487	-4.36664	1.80757e-05	0.000545148
	ZNF334	-0.585495	6.69399	-3.47237	0.00060175	0.00794668
	C10orf82	-0.584136	1.68025	-3.19029	0.00159134	0.0161281
	GATA5	-0.583646	4.51254	-2.69767	0.00742818	0.0472412
	MGC12916	-0.583505	2.63775	-4.75157	3.30378e-06	0.000152166
	COL6A3	-0.583451	11.6282	-4.68744	4.41909e-06	0.000187314
	CAP2	-0.58335	8.2254	-5.02996	9.02564e-07	6.42184e-05
	LINGO2	-0.583187	1.31689	-4.07183	6.15451e-05	0.00142477
	STK33	-0.583025	5.32204	-3.71489	0.00024765	0.00410365
	NACAD	-0.582609	6.179	-4.38878	1.64423e-05	0.000502846
	ACP5	-0.582551	8.72068	-3.62268	0.000349041	0.00528167
	CASQ2	-0.581787	5.68604	-2.91194	0.003896	0.0305511
	DENND2A	-0.581319	6.9846	-4.7351	3.56109e-06	0.000158765
	PODN	-0.581083	9.5082	-4.11895	5.08304e-05	0.00122049
	ZNF185	-0.579656	9.15891	-4.51789	9.39428e-06	0.000326868
	GDF5	-0.579386	3.50226	-3.34417	0.000943802	0.0110641
	SOX10	-0.579231	3.79631	-2.69722	0.00743788	0.0472856
	MMRN1	-0.579028	6.57584	-3.33739	0.000966163	0.0112094
	DPYSL3	-0.578178	11.7445	-5.61245	4.99819e-08	1.03724e-05
	RASGRP2	-0.578042	6.5905	-4.20783	3.52664e-05	0.000912112
	BNC2	-0.577522	7.00427	-4.48946	1.06382e-05	0.000358354
	LOC728392	-0.577135	7.08255	-4.44057	1.31558e-05	0.000422342
	PCDH9	-0.5754	4.98781	-3.9066	0.000118724	0.00238159
	JAZF1	-0.574942	8.37453	-5.2925	2.52248e-07	2.73118e-05
	C1orf88	-0.574809	8.40979	-4.58586	6.96117e-06	0.000260402
	ANKRD53	-0.574648	3.19125	-4.39792	1.58105e-05	0.000489536
	MMP28	-0.574323	6.3198	-3.72473	0.000238656	0.0039811
	LRRTM1	-0.57379	2.02401	-3.51772	0.000511556	0.0069864
	KLRB1	-0.573156	4.79262	-3.38036	0.000832326	0.0101477
	OLFML3	-0.572832	9.18339	-4.44679	1.28062e-05	0.000413083
	SMTN	-0.572605	11.2007	-4.93079	1.44221e-06	8.6992e-05
	MT1X	-0.572279	9.66091	-3.64877	0.000316961	0.00491135
	RDH16	-0.572182	5.97963	-2.72257	0.00690506	0.0451352
	F7	-0.571851	2.20589	-4.42462	1.40941e-05	0.000446706
	AKR1C2	-0.571081	4.50209	-3.03108	0.00267669	0.02333
	NBL1	-0.570984	12.2398	-4.40345	1.54393e-05	0.000479746
	GSTM3	-0.570653	9.11223	-5.158	4.87665e-07	4.12669e-05
	GRASP	-0.570085	7.00843	-4.48077	1.1049e-05	0.000368976
	AFF2	-0.569456	4.16971	-3.7335	0.00023089	0.00388876
	PDGFRA	-0.569161	8.63219	-3.66769	0.000295462	0.00468949
	ZNF711	-0.568973	5.59533	-3.95291	9.89709e-05	0.00206371
	DPP4	-0.568842	12.0214	-3.49342	0.000558173	0.00750777
	SLC35F1	-0.568758	4.88503	-2.89391	0.00411948	0.0316486
	RHBDL3	-0.568572	4.35935	-4.04907	6.74615e-05	0.00153124
	POPDC2	-0.567919	7.15933	-4.56185	7.742e-06	0.00028342
	C5orf4	-0.566844	8.51862	-4.2175	3.38785e-05	0.000881448
	C2orf71	-0.566753	0.870404	-5.01486	9.69778e-07	6.81411e-05
	GALNT9	-0.566481	2.23688	-3.89397	0.000124729	0.00245811
	RGS9	-0.566431	4.75029	-3.20101	0.00153541	0.0156797
	HSPB2	-0.566345	5.57737	-4.22629	3.26638e-05	0.000861414
	HR	-0.566122	6.82108	-3.80459	0.000176206	0.00316337
	COL25A1	-0.565019	2.87375	-3.2109	0.00148546	0.0153403
	LONRF3	-0.564884	3.94142	-3.90341	0.000120215	0.00239505
	EMP1	-0.563673	10.359	-4.26803	2.74369e-05	0.000750831
	CACHD1	-0.563309	7.60385	-4.19094	3.78208e-05	0.000969546
	RND3	-0.562968	8.76081	-3.91674	0.000114103	0.00232093
	ID4	-0.562799	8.06092	-3.48718	0.000570778	0.0076468
	DKK3	-0.562319	10.2889	-4.37188	1.7676e-05	0.000534944
	GCNT4	-0.560467	3.84189	-4.2642	2.7881e-05	0.000757042
	C1orf95	-0.560091	5.88739	-3.44765	0.000656993	0.00848977
	HFE	-0.560003	5.97	-4.18289	3.90998e-05	0.000991529
	LEPR	-0.559914	8.14427	-4.7403	3.47784e-06	0.000156655
	PTGER3	-0.559845	5.84263	-3.59744	0.000382954	0.00565281
	KCNE1L	-0.559426	1.42973	-4.89883	1.67487e-06	9.6088e-05
	DMD	-0.559076	8.85146	-3.98081	8.86202e-05	0.00190016
	POU2AF1	-0.559071	4.80267	-2.78238	0.00578195	0.0399172
	CLDN11	-0.55865	7.08639	-4.2252	3.28115e-05	0.000864004
	SPRY3	-0.558555	4.84731	-4.77177	3.01271e-06	0.000144677
	CDH26	-0.55848	7.8589	-2.8995	0.00404891	0.0312599
	RBP1	-0.558425	7.00784	-4.55055	8.13791e-06	0.000291294
	HOXD13	-0.557816	6.25682	-2.92604	0.00372891	0.0296274
	ZNF516	-0.557653	7.55117	-3.94825	0.00010081	0.00209453
	ADAMTSL4	-0.557613	6.43537	-4.46529	1.18185e-05	0.000389454
	ARC	-0.557235	4.11347	-3.13767	0.00189409	0.018262
	SLC15A2	-0.557213	9.96312	-3.21364	0.00147191	0.0152275
	CAV2	-0.55668	8.4637	-4.79438	2.7162e-06	0.000135813
	SOX17	-0.556401	5.72511	-3.95644	9.76026e-05	0.00203761
	FAM38B	-0.556326	6.39939	-4.17782	3.99266e-05	0.00100433
	CYP27C1	-0.555543	2.59711	-4.13775	4.70723e-05	0.00114764
	CLIP4	-0.555316	8.31134	-5.4847	9.61997e-08	1.47898e-05
	NES	-0.55481	10.0389	-5.04898	8.24291e-07	5.9871e-05
	FAM150B	-0.554747	2.43297	-3.78138	0.000192552	0.00338705
	EPB41L3	-0.554563	7.87645	-4.63455	5.60409e-06	0.00022253
	PPAPDC3	-0.554342	5.17748	-4.14968	4.48266e-05	0.00110214
	KCNT2	-0.553244	3.78753	-3.52227	0.000503234	0.00689652
	IGFBP6	-0.553186	8.61525	-3.53192	0.000486021	0.00673475
	AFF3	-0.552537	10.1439	-3.04044	0.0025976	0.022904
	PRKCQ	-0.5513	4.2644	-3.66172	0.000302096	0.00474668
	EGFLAM	-0.551244	7.02955	-4.57807	7.20594e-06	0.000266696
	COL27A1	-0.550972	6.82903	-2.86924	0.00444421	0.0332496
	FILIP1L	-0.550749	9.64772	-3.84189	0.000152663	0.00287389
	MATN2	-0.548676	10.8713	-4.36714	1.80372e-05	0.00054493
	FGF7	-0.548319	7.13275	-3.83984	0.000153877	0.0028905
	NGFR	-0.547953	8.0821	-3.25754	0.00126953	0.0136104
	C7orf51	-0.547807	4.08899	-4.5977	6.60491e-06	0.000249872
	RASGRF2	-0.547716	5.82086	-4.82482	2.36111e-06	0.000122106
	NTRK2	-0.546881	7.21445	-3.43806	0.000679685	0.0086737
	CPE	-0.546734	13.1389	-4.11127	5.24459e-05	0.00125067
	C9orf125	-0.546556	6.5294	-3.07674	0.00231076	0.0210566
	RAPGEF4	-0.545537	7.36433	-4.22691	3.25792e-05	0.000861414
	EDIL3	-0.545413	6.197	-3.47216	0.000602201	0.00794668
	FZD7	-0.544897	9.2401	-5.21856	3.62993e-07	3.43897e-05
	TNFAIP8L3	-0.544862	5.64007	-4.17954	3.96443e-05	0.00100195
	STXBP6	-0.544781	7.50673	-3.43902	0.000677371	0.0086505
	PRKG1	-0.544686	5.1215	-3.29023	0.00113599	0.012589
	SOX15	-0.544515	5.37103	-3.91823	0.000113441	0.00231287
	HPDL	-0.544323	3.57128	-3.35857	0.000897881	0.0107425
	RYR1	-0.544264	5.57293	-3.08315	0.0022633	0.0207324
	GRIK4	-0.543915	2.45954	-3.64191	0.000325121	0.0049934
	PNMAL2	-0.543885	5.46281	-4.68704	4.42712e-06	0.000187314
	CD8A	-0.543698	6.59483	-3.64556	0.000320754	0.00494376
	NKD1	-0.543553	5.68272	-3.39146	0.000800668	0.00983597
	PAK7	-0.543506	2.99702	-3.12921	0.0019475	0.0185747
	SPARCL1	-0.543105	12.7667	-4.41406	1.47504e-05	0.000463296
	SAMD14	-0.542733	4.58414	-4.15438	4.39706e-05	0.00108569
	RNLS	-0.542456	7.37776	-3.08975	0.00221529	0.0204312
	EHD2	-0.542428	10.1817	-4.70101	4.15646e-06	0.000179571
	SOX5	-0.54216	3.97661	-3.85828	0.000143292	0.00273888
	C1orf114	-0.54193	3.56906	-4.28031	2.60582e-05	0.000725389
	SLC5A7	-0.541327	1.45721	-3.66251	0.000301209	0.00474316
	NPR2	-0.541229	7.40847	-5.12696	5.66767e-07	4.53893e-05
	PTRF	-0.540688	12.3035	-4.84822	2.11915e-06	0.000114016
	UGT3A2	-0.540411	1.6961	-3.59006	0.000393442	0.00575858
	FAM198A	-0.539523	5.6392	-4.74373	3.42392e-06	0.000156474
	GRIK3	-0.539466	4.84715	-3.37544	0.000846708	0.0102784
	SLC24A3	-0.539402	7.94569	-4.05738	6.52424e-05	0.00149057
	MEIS3P1	-0.539312	7.82056	-5.57565	6.04242e-08	1.15749e-05
	PHYHIPL	-0.538873	5.5229	-3.42073	0.000722532	0.00910714
	CHRNA7	-0.538819	2.45188	-2.7781	0.00585643	0.0402878
	VILL	-0.538796	7.56619	-3.28321	0.00116351	0.0128045
	COL4A3	-0.538234	5.70757	-3.63606	0.000332233	0.00506691
	MEIS3	-0.5379	7.51318	-2.90672	0.00395944	0.0308129
	CCDC8	-0.537659	7.13302	-3.8968	0.000123358	0.00244615
	PPP1R12B	-0.537119	11.9121	-4.69448	4.28086e-06	0.000182455
	CNRIP1	-0.536898	7.00349	-4.88133	1.81724e-06	0.000101533
	FAM178B	-0.536709	2.19996	-4.32149	2.19021e-05	0.000634214
	CLEC3B	-0.536672	7.09296	-3.75801	0.000210447	0.00361787
	IL7R	-0.536152	5.61588	-2.71262	0.00711005	0.0460581
	EDNRA	-0.53598	9.11935	-4.00966	7.90065e-05	0.00172749
	FERMT2	-0.53583	9.88336	-5.6967	3.22585e-08	7.96405e-06
	COCH	-0.535596	8.99344	-2.95944	0.00335918	0.0274917
	IL1RL2	-0.535595	2.92708	-2.80029	0.0054794	0.0384993
	VCL	-0.535313	11.6102	-5.48021	9.84175e-08	1.47898e-05
	COL6A1	-0.534905	11.4519	-4.82593	2.34912e-06	0.000122106
	FERMT1	-0.534863	7.65608	-3.02197	0.00275574	0.0238284
	LCN6	-0.534853	2.25576	-3.56822	0.000426093	0.00609324
	UBE2QL1	-0.534483	6.632	-4.07769	6.01039e-05	0.00139698
	GEM	-0.534091	8.19453	-3.71524	0.000247328	0.0041022
	KCNMA1	-0.534088	10.0472	-4.08119	5.92593e-05	0.00138103
	NHSL2	-0.533982	4.97004	-4.0132	7.78951e-05	0.00170586
	RSPO3	-0.532858	5.96077	-2.81802	0.00519412	0.0369879
	PRUNE2	-0.532835	11.4643	-3.5388	0.000474095	0.00660803
	PCDH7	-0.532792	8.30726	-3.31918	0.00102871	0.0116976
	LOC283392	-0.532571	2.86154	-3.76756	0.000202947	0.00352016
	NPAS4	-0.532209	2.08253	-3.35442	0.000910889	0.010846
	SLC35F4	-0.532025	2.54509	-4.01361	7.77684e-05	0.00170586
	MCC	-0.531956	8.69332	-4.17875	3.97746e-05	0.00100195
	CCDC69	-0.531725	8.90427	-4.5607	7.78135e-06	0.00028342
	C2orf43	-0.531212	7.04356	-3.00615	0.00289814	0.0248136
	CAV3	-0.530406	1.62951	-3.33461	0.000975491	0.0112838
	FEZ1	-0.530382	7.08084	-4.92792	1.46176e-06	8.70445e-05
	SERPING1	-0.530229	11.5418	-4.39302	1.61465e-05	0.000497289
	EBF1	-0.529035	6.58458	-4.48809	1.0702e-05	0.000358763
	TSPAN7	-0.528953	8.15729	-4.62767	5.77918e-06	0.000228441
	BDNF	-0.528696	4.73291	-3.44641	0.000659894	0.00850834
	HOXC10	-0.528021	1.75266	-3.11878	0.00201521	0.018999
	TRIM63	-0.527867	1.99409	-2.69545	0.0074765	0.0474274
	FAM19A1	-0.527762	2.52545	-3.54798	0.000458585	0.00646245
	DACT3	-0.527219	7.75268	-3.78545	0.000189584	0.00334159
	OSTBETA	-0.526515	1.4123	-4.27755	2.63619e-05	0.000730923
	PALLD	-0.525891	11.8377	-4.74209	3.44965e-06	0.0001566
	EID3	-0.525758	4.68753	-4.79228	2.74244e-06	0.000135813
	SNCG	-0.525332	6.83093	-3.67871	0.000283574	0.00454762
	CCDC89	-0.525317	3.75161	-4.41125	1.49296e-05	0.000465699
	TMEM176B	-0.525301	8.2964	-3.98887	8.58279e-05	0.00185397
	GLT1D1	-0.525038	2.877	-3.05377	0.00248865	0.022179
	C10orf108	-0.524954	4.1675	-3.57511	0.000415522	0.00599084
	RAB40AL	-0.524753	2.71543	-4.65115	5.20256e-06	0.00021042
	PCDH10	-0.524599	8.18573	-3.05265	0.00249766	0.0222479
	NAALAD2	-0.524326	4.39997	-3.02346	0.00274264	0.0237387
	MAN1A1	-0.524235	8.75627	-3.91161	0.00011642	0.00235707
	IRAK3	-0.523698	7.06953	-4.70018	4.172e-06	0.000179571
	C6orf186	-0.523498	3.14728	-3.70316	0.000258798	0.00424
	CA11	-0.52302	6.90066	-4.02145	7.5368e-05	0.00166728
	PDGFC	-0.522814	8.71675	-4.27325	2.68424e-05	0.000739205
	ST8SIA1	-0.5222	6.64322	-3.49033	0.000564384	0.00757379
	FAM101A	-0.522198	6.30474	-2.70243	0.00732551	0.0468962
	FAM18A	-0.521848	4.70536	-4.97246	1.18543e-06	7.58121e-05
	BAALC	-0.520711	3.74401	-3.81067	0.000172148	0.00311617
	B4GALNT1	-0.520573	5.00329	-3.87703	0.000133237	0.00260087
	ALDH1L2	-0.520444	5.9467	-3.90139	0.000121169	0.00240847
	ADAMTS1	-0.520354	10.4888	-3.14054	0.00187635	0.0181471
	TNC	-0.520206	10.8569	-3.91402	0.000115326	0.00234036
	SEMA6D	-0.519168	5.88058	-3.56347	0.000433524	0.00617417
	TIMP3	-0.518966	12.3148	-4.62388	5.87766e-06	0.000230246
	JAKMIP2	-0.518913	2.68582	-3.69532	0.000266514	0.00432979
	TACR1	-0.51875	5.62597	-3.78919	0.000186898	0.00330761
	SOSTDC1	-0.518159	4.00024	-2.73498	0.00665698	0.0440442
	COL6A2	-0.517802	12.5442	-4.72007	3.81258e-06	0.000168492
	INSRR	-0.51759	1.68531	-3.14135	0.00187135	0.0181297
	SSPN	-0.517434	8.89247	-4.57318	7.36346e-06	0.000270801
	GRIK5	-0.517346	6.57533	-4.32396	2.16744e-05	0.000630764
	ZNF204P	-0.516807	6.54315	-3.21744	0.00145327	0.0150705
	LDB2	-0.516164	7.73894	-5.11458	6.01669e-07	4.73871e-05
	ACPP	-0.516117	16.0409	-2.67657	0.00789906	0.0491949
	ETS2	-0.51555	10.6053	-4.13543	4.75203e-05	0.00115533
	P2RX6	-0.515368	2.4098	-3.75276	0.000214674	0.00366705
	ADAMTS9	-0.514818	7.71751	-3.82437	0.000163328	0.00300966
	KCNJ8	-0.514796	7.2363	-4.1467	4.53781e-05	0.00111413
	GNAZ	-0.5145	7.22866	-4.54464	8.35246e-06	0.000296538
	VAT1L	-0.514264	1.93317	-2.82759	0.00504584	0.0363111
	CST7	-0.514185	5.30931	-3.46888	0.000609281	0.00800375
	PNMAL1	-0.51337	7.16733	-3.05409	0.00248608	0.0221674
	IGDCC4	-0.512017	3.38901	-3.3264	0.00100347	0.0114856
	DZIP1	-0.511748	7.37584	-4.58434	7.00837e-06	0.000261606
	ZFP36	-0.511639	12.454	-2.79491	0.00556868	0.0389539
	TRPC1	-0.511478	6.47872	-4.54086	8.49271e-06	0.000299686
	GPER	-0.511176	6.85393	-3.48657	0.000572018	0.0076468
	ARSI	-0.51093	4.4427	-4.08518	5.83089e-05	0.00136435
	ABCC9	-0.510755	7.70021	-3.59159	0.00039125	0.00573614
	SLIT3	-0.510743	7.79375	-3.70151	0.000260404	0.00426232
	NRXN2	-0.5104	6.64225	-3.54244	0.000467893	0.0065457
	ZAK	-0.509973	10.4749	-4.96297	1.23972e-06	7.85847e-05
	PTCHD1	-0.509868	4.90929	-2.78001	0.0058231	0.0401219
	NRG1	-0.509259	3.67744	-2.70394	0.00729319	0.046758
	SULT1C4	-0.508817	5.35446	-2.76582	0.00607496	0.0412057
	LGALS3	-0.508793	10.6111	-3.76203	0.000207257	0.00357359
	TRPC6	-0.508638	5.0577	-3.67969	0.000282547	0.0045437
	SLC16A5	-0.508435	6.5079	-2.9811	0.0031376	0.0261697
	EVC2	-0.508075	5.94658	-3.63751	0.00033045	0.00505671
	YBX2	-0.507798	2.78447	-3.21605	0.00146005	0.0151318
	PDLIM7	-0.507797	10.1778	-4.39234	1.61937e-05	0.000497864
	ART5	-0.507669	2.86067	-3.81283	0.000170728	0.00309691
	CCDC68	-0.507474	5.93171	-3.51826	0.000510556	0.0069804
	CAND2	-0.50668	6.49948	-4.4207	1.43341e-05	0.000451849
	ETV5	-0.506637	7.32517	-3.99146	8.495e-05	0.00184415
	GEFT	-0.506302	8.69768	-4.59497	6.6853e-06	0.000252247
	NID1	-0.506112	9.66204	-4.61507	6.1134e-06	0.000234994
	SSC5D	-0.505573	7.98332	-3.33406	0.000977337	0.0112896
	ANXA6	-0.50532	10.9046	-5.06357	7.68776e-07	5.65455e-05
	DACT1	-0.505155	7.66519	-4.26578	2.76962e-05	0.000755522
	TRO	-0.504596	6.05639	-3.87422	0.0001347	0.00262064
	CD28	-0.504543	5.09702	-3.15096	0.00181297	0.0177748
	NT5E	-0.504059	7.57613	-3.53139	0.000486959	0.00673704
	PLIN4	-0.503829	8.36601	-3.60391	0.000373986	0.00553894
	WNT16	-0.50321	2.80103	-3.16148	0.00175108	0.0173528
	DTNA	-0.503146	8.19073	-3.26295	0.00124647	0.0134376
	KIT	-0.503103	7.00372	-3.29088	0.00113347	0.0125691
	DARC	-0.502833	8.7415	-3.08705	0.00223481	0.0205254
	CD3G	-0.502763	3.61623	-2.97138	0.00323532	0.0266784
	MEGF10	-0.502508	5.11421	-3.66523	0.000298174	0.00470386
	DUSP5	-0.501715	8.41758	-2.70896	0.0071866	0.0463817
	PTGS1	-0.501715	7.62566	-3.58458	0.000401415	0.00583608
	KIAA1462	-0.501644	9.2871	-4.3973	1.58528e-05	0.000489974
	GYPC	-0.501632	7.84353	-4.61584	6.09246e-06	0.000234994
	RERGL	-0.501449	3.96984	-2.72441	0.00686779	0.0450073
	FOXC1	-0.501196	7.97532	-4.30143	2.38401e-05	0.000677947
	HS3ST3B1	-0.501158	3.35399	-4.09987	5.49349e-05	0.00129584
	DRD5	-0.500698	1.24713	-4.19185	3.7679e-05	0.000967334
	GSN	-0.500684	12.693	-4.80122	2.63222e-06	0.000133775
	NOVA1	-0.500503	5.58996	-3.35877	0.000897237	0.0107422
	SV2A	-0.500103	6.36374	-4.24149	3.06579e-05	0.000817169

## Sheet: S7
	Gene sets and pathways enriched in genes upregulated in cribriform					Gene sets and pathways enriched in genes downregulated in cribriform
	Gene Set Name	p-value	q-value			Gene Set Name	p-value	q-value
	HALLMARK_E2F_TARGETS	5.73008e-46	2.86504e-44			HALLMARK_E2F_TARGETS	6.01042e-14	1.7888e-12
	HALLMARK_G2M_CHECKPOINT	1.77352e-29	4.43379e-28			HALLMARK_MYOGENESIS	7.15519e-14	1.7888e-12
	HALLMARK_MYC_TARGETS_V1	2.32593e-19	3.87655e-18			HALLMARK_G2M_CHECKPOINT	5.69773e-11	9.49622e-10
	HALLMARK_OXIDATIVE_PHOSPHORYLATION	2.39409e-08	2.99261e-07			HALLMARK_EPITHELIAL_MESENCHYMAL_TRANSITION	8.15198e-11	1.019e-09
	HALLMARK_DNA_REPAIR	1.16138e-07	1.00855e-06			HALLMARK_APICAL_JUNCTION	1.82867e-05	0.000165733
	HALLMARK_MYC_TARGETS_V2	1.21026e-07	1.00855e-06			HALLMARK_KRAS_SIGNALING_UP	1.98879e-05	0.000165733
	HALLMARK_MTORC1_SIGNALING	2.48343e-06	1.77388e-05			HALLMARK_COAGULATION	0.000297532	0.00212523
	HALLMARK_MITOTIC_SPINDLE	3.21442e-05	0.000200901			HALLMARK_UV_RESPONSE_DN	0.00109157	0.00682231
	HALLMARK_UNFOLDED_PROTEIN_RESPONSE	0.00440043	0.0244468			HALLMARK_ALLOGRAFT_REJECTION	0.00128494	0.00713858
	KEGG_DNA_REPLICATION	1.2214e-09	2.2718e-07			HALLMARK_XENOBIOTIC_METABOLISM	0.00513411	0.0256705
	KEGG_HOMOLOGOUS_RECOMBINATION	8.46149e-09	7.86919e-07			HALLMARK_COMPLEMENT	0.0101968	0.0463493
	KEGG_CELL_CYCLE	1.7322e-08	1.07396e-06			KEGG_CYTOKINE_CYTOKINE_RECEPTOR_INTERACTION	9.21537e-19	1.71406e-16
	KEGG_BASE_EXCISION_REPAIR	7.66721e-08	3.56525e-06			KEGG_CALCIUM_SIGNALING_PATHWAY	1.87256e-14	1.74148e-12
	KEGG_SPLICEOSOME	2.66441e-07	9.9116e-06			KEGG_HEMATOPOIETIC_CELL_LINEAGE	8.52164e-14	5.28342e-12
	KEGG_MISMATCH_REPAIR	3.59019e-07	1.11296e-05			KEGG_CELL_ADHESION_MOLECULES_CAMS	1.13785e-13	5.29101e-12
	KEGG_UBIQUITIN_MEDIATED_PROTEOLYSIS	3.09008e-06	7.67032e-05			KEGG_DILATED_CARDIOMYOPATHY	6.7487e-13	2.51052e-11
	KEGG_PROTEASOME	3.29906e-06	7.67032e-05			KEGG_HYPERTROPHIC_CARDIOMYOPATHY_HCM	2.86108e-11	8.86935e-10
	KEGG_OXIDATIVE_PHOSPHORYLATION	3.93475e-06	7.81545e-05			KEGG_VASCULAR_SMOOTH_MUSCLE_CONTRACTION	2.60499e-10	6.92184e-09
	KEGG_HUNTINGTONS_DISEASE	4.20186e-06	7.81545e-05			KEGG_ARRHYTHMOGENIC_RIGHT_VENTRICULAR_CARDIOMYOPATHY_ARVC	3.68034e-10	8.5568e-09
	KEGG_AMINOACYL_TRNA_BIOSYNTHESIS	6.21314e-06	0.000105058			KEGG_FOCAL_ADHESION	6.03151e-10	1.24651e-08
	KEGG_PYRIMIDINE_METABOLISM	1.68224e-05	0.000260747			KEGG_NEUROACTIVE_LIGAND_RECEPTOR_INTERACTION	3.8549e-09	7.17012e-08
	KEGG_PARKINSONS_DISEASE	2.45676e-05	0.000351505			KEGG_COMPLEMENT_AND_COAGULATION_CASCADES	3.50848e-08	5.93252e-07
	KEGG_NUCLEOTIDE_EXCISION_REPAIR	0.000214801	0.00285379			KEGG_CHEMOKINE_SIGNALING_PATHWAY	1.67168e-07	2.59111e-06
	KEGG_RNA_DEGRADATION	0.000311718	0.0038653			KEGG_JAK_STAT_SIGNALING_PATHWAY	2.0521e-07	2.93609e-06
	KEGG_PORPHYRIN_AND_CHLOROPHYLL_METABOLISM	0.00238621	0.0277397			KEGG_VIRAL_MYOCARDITIS	1.88288e-06	2.50153e-05
	KEGG_ALZHEIMERS_DISEASE	0.00301033	0.0329365			KEGG_GRAFT_VERSUS_HOST_DISEASE	2.02752e-06	2.51412e-05
	KEGG_OOCYTE_MEIOSIS	0.00408092	0.0421695			KEGG_AUTOIMMUNE_THYROID_DISEASE	2.83536e-06	3.29611e-05
	CELL_CYCLE_PROCESS	7.45715e-15	5.86169e-12			KEGG_ALLOGRAFT_REJECTION	3.9452e-06	4.31652e-05
	DNA_METABOLIC_PROCESS	1.42102e-14	5.86169e-12			KEGG_INTESTINAL_IMMUNE_NETWORK_FOR_IGA_PRODUCTION	4.28313e-06	4.4259e-05
	DNA_REPAIR	1.00122e-13	2.75335e-11			KEGG_NATURAL_KILLER_CELL_MEDIATED_CYTOTOXICITY	4.81093e-06	4.53931e-05
	RESPONSE_TO_DNA_DAMAGE_STIMULUS	1.53266e-13	3.16112e-11			KEGG_LYSOSOME	4.88098e-06	4.53931e-05
	M_PHASE	3.83846e-13	6.33346e-11			KEGG_REGULATION_OF_ACTIN_CYTOSKELETON	6.14615e-06	5.44373e-05
	CELL_CYCLE_PHASE	9.57015e-13	1.3159e-10			KEGG_AXON_GUIDANCE	1.54693e-05	0.000130786
	RESPONSE_TO_ENDOGENOUS_STIMULUS	6.21258e-12	7.32198e-10			KEGG_ECM_RECEPTOR_INTERACTION	1.97938e-05	0.000160072
	CELL_CYCLE_GO_0007049	1.53597e-11	1.58397e-09			KEGG_MAPK_SIGNALING_PATHWAY	2.13738e-05	0.000165647
	M_PHASE_OF_MITOTIC_CELL_CYCLE	2.28704e-11	2.09646e-09			KEGG_MELANOGENESIS	2.36496e-05	0.000175953
	MITOTIC_CELL_CYCLE	3.91378e-11	3.22887e-09			KEGG_PRIMARY_IMMUNODEFICIENCY	3.20769e-05	0.000229473
	MITOSIS	1.4613e-10	1.09598e-08			KEGG_ARACHIDONIC_ACID_METABOLISM	6.2557e-05	0.000430948
	NUCLEOBASENUCLEOSIDENUCLEOTIDE_AND_NUCLEIC_ACID_METABOLIC_PROCESS	1.35259e-09	9.29903e-08			KEGG_PATHWAYS_IN_CANCER	7.44758e-05	0.000494732
	DNA_REPLICATION	1.27462e-08	8.08891e-07			KEGG_LEUKOCYTE_TRANSENDOTHELIAL_MIGRATION	8.7762e-05	0.000562887
	RNA_PROCESSING	3.62822e-08	2.13806e-06			KEGG_GLYCOSAMINOGLYCAN_DEGRADATION	0.0001073	0.000665263
	CHROMOSOME_ORGANIZATION_AND_BIOGENESIS	6.73941e-08	3.70668e-06			KEGG_TYPE_I_DIABETES_MELLITUS	0.000126657	0.000759942
	BIOPOLYMER_METABOLIC_PROCESS	2.93963e-07	1.51575e-05			KEGG_LONG_TERM_DEPRESSION	0.000187781	0.00109148
	CELL_CYCLE_CHECKPOINT_GO_0000075	1.03787e-06	5.0367e-05			KEGG_WNT_SIGNALING_PATHWAY	0.000285593	0.00160971
	DNA_DEPENDENT_DNA_REPLICATION	2.69623e-06	0.000123577			KEGG_GAP_JUNCTION	0.000311946	0.00170653
	ESTABLISHMENT_AND_OR_MAINTENANCE_OF_CHROMATIN_ARCHITECTURE	9.87035e-06	0.000428581			KEGG_ASTHMA	0.000375544	0.00199575
	RNA_SPLICING	1.0808e-05	0.000439517			KEGG_DRUG_METABOLISM_CYTOCHROME_P450	0.000607392	0.00313819
	ORGANELLE_ORGANIZATION_AND_BIOGENESIS	1.11877e-05	0.000439517			KEGG_OLFACTORY_TRANSDUCTION	0.00100444	0.00504935
	REGULATION_OF_MITOSIS	6.34923e-05	0.00238096			KEGG_METABOLISM_OF_XENOBIOTICS_BY_CYTOCHROME_P450	0.00131579	0.00644046
	RNA_3END_PROCESSING	7.171e-05	0.00257221			KEGG_BASAL_CELL_CARCINOMA	0.00148044	0.00706055
	DNA_INTEGRITY_CHECKPOINT	0.000111442	0.00383081			KEGG_ANTIGEN_PROCESSING_AND_PRESENTATION	0.00169728	0.0077727
	DNA_REPLICATION_INITIATION	0.000143909	0.00474901			KEGG_LEISHMANIA_INFECTION	0.00171334	0.0077727
	SPINDLE_ORGANIZATION_AND_BIOGENESIS	0.000155854	0.00494537			KEGG_GNRH_SIGNALING_PATHWAY	0.00178582	0.00790862
	NEGATIVE_REGULATION_OF_DNA_REPLICATION	0.000195363	0.00596943			KEGG_O_GLYCAN_BIOSYNTHESIS	0.00199885	0.00864618
	DNA_PACKAGING	0.000261123	0.0076938			KEGG_ADHERENS_JUNCTION	0.00237055	0.0100209
	RNA_METABOLIC_PROCESS	0.000288412	0.00820483			KEGG_TGF_BETA_SIGNALING_PATHWAY	0.00308572	0.0127543
	G1_S_TRANSITION_OF_MITOTIC_CELL_CYCLE	0.000300425	0.00823518			KEGG_PPAR_SIGNALING_PATHWAY	0.00333784	0.0134965
	BASE_EXCISION_REPAIR	0.000310046	0.00823518			KEGG_ALDOSTERONE_REGULATED_SODIUM_REABSORPTION	0.00573124	0.0226811
	MRNA_PROCESSING_GO_0006397	0.000329439	0.00823518			KEGG_GLYCOSPHINGOLIPID_BIOSYNTHESIS_GLOBO_SERIES	0.00612036	0.0237164
	CHROMATIN_MODIFICATION	0.000334917	0.00823518			KEGG_GLYCOSPHINGOLIPID_BIOSYNTHESIS_GANGLIO_SERIES	0.00698107	0.0264996
	INTERPHASE_OF_MITOTIC_CELL_CYCLE	0.000339389	0.00823518			KEGG_ARGININE_AND_PROLINE_METABOLISM	0.00881817	0.0328036
	DOUBLE_STRAND_BREAK_REPAIR	0.000457946	0.010619			KEGG_FATTY_ACID_METABOLISM	0.00936949	0.0335232
	CHROMOSOME_SEGREGATION	0.000463376	0.010619			KEGG_CARDIAC_MUSCLE_CONTRACTION	0.00937209	0.0335232
	MITOTIC_SPINDLE_ORGANIZATION_AND_BIOGENESIS	0.000480408	0.0107118			KEGG_ETHER_LIPID_METABOLISM	0.00960173	0.0336966
	MICROTUBULE_CYTOSKELETON_ORGANIZATION_AND_BIOGENESIS	0.000621764	0.0134988			KEGG_ENDOCYTOSIS	0.0112649	0.0388015
	MRNA_METABOLIC_PROCESS	0.000897333	0.0189821			KEGG_TIGHT_JUNCTION	0.0137522	0.0458278
	INTERPHASE	0.000975558	0.0201209			KEGG_ACUTE_MYELOID_LEUKEMIA	0.0137976	0.0458278
	RIBONUCLEOPROTEIN_COMPLEX_BIOGENESIS_AND_ASSEMBLY	0.00104318	0.0209908			KEGG_PRION_DISEASES	0.0146628	0.0478471
	NEGATIVE_REGULATION_OF_DNA_METABOLIC_PROCESS	0.00134424	0.0264046			SIGNAL_TRANSDUCTION	3.19383e-23	2.63491e-20
	REGULATION_OF_CELL_CYCLE	0.00149624	0.0285145			ANATOMICAL_STRUCTURE_DEVELOPMENT	1.52076e-20	6.27314e-18
	REGULATION_OF_DNA_METABOLIC_PROCESS	0.00152077	0.0285145			IMMUNE_RESPONSE	8.79006e-20	2.41727e-17
	MITOTIC_CELL_CYCLE_CHECKPOINT	0.00160666	0.0292776			ORGAN_DEVELOPMENT	1.76313e-19	3.63646e-17
	CHROMATIN_ASSEMBLY_OR_DISASSEMBLY	0.00163245	0.0292776			CELL_SURFACE_RECEPTOR_LINKED_SIGNAL_TRANSDUCTION_GO_0007166	2.30667e-19	3.80601e-17
	ORGANELLE_LOCALIZATION	0.00232854	0.0408733			IMMUNE_SYSTEM_PROCESS	3.10494e-19	4.26929e-17
	TRANSCRIPTION_FROM_RNA_POLYMERASE_III_PROMOTER	0.00263771	0.0453356			SYSTEM_DEVELOPMENT	1.96419e-18	2.31493e-16
						DEFENSE_RESPONSE	2.38933e-18	2.464e-16
						MULTICELLULAR_ORGANISMAL_DEVELOPMENT	1.20397e-16	1.10364e-14
						SYSTEM_PROCESS	5.16627e-15	4.26217e-13
						RESPONSE_TO_WOUNDING	9.98332e-14	7.48749e-12
						CELL_CELL_SIGNALING	1.1683e-11	8.03209e-10
						INFLAMMATORY_RESPONSE	2.32929e-11	1.47821e-09
						REGULATION_OF_MULTICELLULAR_ORGANISMAL_PROCESS	5.47212e-11	3.22464e-09
						RESPONSE_TO_EXTERNAL_STIMULUS	3.88519e-10	2.13686e-08
						ANATOMICAL_STRUCTURE_MORPHOGENESIS	2.11157e-09	1.08878e-07
						G_PROTEIN_COUPLED_RECEPTOR_PROTEIN_SIGNALING_PATHWAY	8.29132e-09	4.02373e-07
						REGULATION_OF_BIOLOGICAL_QUALITY	1.14441e-08	5.0642e-07
						ION_TRANSPORT	1.1663e-08	5.0642e-07
						METAL_ION_TRANSPORT	4.37634e-08	1.80135e-06
						MUSCLE_DEVELOPMENT	4.58525e-08	1.80135e-06
						CELLULAR_CATION_HOMEOSTASIS	1.19142e-07	4.46782e-06
						SKELETAL_DEVELOPMENT	1.55696e-07	5.58476e-06
						CATION_TRANSPORT	1.84069e-07	6.32738e-06
						CATION_HOMEOSTASIS	3.21147e-07	1.05978e-05
						BEHAVIOR	8.56953e-07	2.71918e-05
						TISSUE_DEVELOPMENT	1.62496e-06	4.96515e-05
						CELLULAR_DEFENSE_RESPONSE	2.88925e-06	8.51298e-05
						ORGAN_MORPHOGENESIS	3.5182e-06	0.000100087
						ION_HOMEOSTASIS	4.82023e-06	0.000132556
						CELL_MIGRATION	7.33198e-06	0.000195125
						REGULATION_OF_CELL_PROLIFERATION	1.12764e-05	0.00029072
						CHEMICAL_HOMEOSTASIS	1.18135e-05	0.000295337
						POTASSIUM_ION_TRANSPORT	1.47204e-05	0.000357187
						REGULATION_OF_HEART_CONTRACTION	1.89662e-05	0.000445163
						CELL_PROLIFERATION_GO_0008283	1.94253e-05	0.000445163
						LOCOMOTORY_BEHAVIOR	2.35611e-05	0.000525348
						POSITIVE_REGULATION_OF_MULTICELLULAR_ORGANISMAL_PROCESS	2.89201e-05	0.000616356
						MULTI_ORGANISM_PROCESS	2.91368e-05	0.000616356
						MONOVALENT_INORGANIC_CATION_TRANSPORT	3.5636e-05	0.000734992
						CELLULAR_HOMEOSTASIS	3.96779e-05	0.000798398
						HOMEOSTATIC_PROCESS	4.2747e-05	0.000839674
						POSITIVE_REGULATION_OF_BIOLOGICAL_PROCESS	5.50374e-05	0.00105595
						SECOND_MESSENGER_MEDIATED_SIGNALING	6.60459e-05	0.00123836
						POSITIVE_REGULATION_OF_CELL_PROLIFERATION	7.46599e-05	0.00136877
						ENZYME_LINKED_RECEPTOR_PROTEIN_SIGNALING_PATHWAY	7.66941e-05	0.00137549
						ANATOMICAL_STRUCTURE_FORMATION	9.03703e-05	0.00158629
						NEUROLOGICAL_SYSTEM_PROCESS	9.48102e-05	0.00162955
						NERVOUS_SYSTEM_DEVELOPMENT	0.000108556	0.00182772
						SYNAPTIC_TRANSMISSION	0.000111852	0.00184556
						T_CELL_ACTIVATION	0.000114147	0.00184649
						TRANSMISSION_OF_NERVE_IMPULSE	0.000132783	0.00210665
						HUMORAL_IMMUNE_RESPONSE	0.000137234	0.00213619
						BONE_REMODELING	0.000165986	0.0025359
						DI___TRI_VALENT_INORGANIC_CATION_TRANSPORT	0.000173715	0.00260573
						ANGIOGENESIS	0.000176932	0.00260658
						TRANSPORT	0.000203343	0.00294312
						TISSUE_REMODELING	0.000220291	0.00313345
						CYTOKINE_PRODUCTION	0.000238018	0.00332822
						REGULATION_OF_ANGIOGENESIS	0.000251711	0.00346102
						VASCULATURE_DEVELOPMENT	0.00030166	0.00407983
						POSITIVE_REGULATION_OF_CELLULAR_PROCESS	0.000319477	0.0042511
						ESTABLISHMENT_OF_LOCALIZATION	0.000333909	0.00437262
						NEGATIVE_REGULATION_OF_BIOLOGICAL_PROCESS	0.000397474	0.00512369
						LEUKOCYTE_ACTIVATION	0.000428793	0.00544237
						REGULATION_OF_BODY_FLUID_LEVELS	0.00044656	0.005582
						WOUND_HEALING	0.000467216	0.00575303
						CELL_ACTIVATION	0.000531362	0.00644667
						SMOOTH_MUSCLE_CONTRACTION_GO_0006939	0.000555115	0.00663724
						RESPONSE_TO_OTHER_ORGANISM	0.000567128	0.00668401
						NEGATIVE_REGULATION_OF_ANGIOGENESIS	0.000611038	0.00710009
						ADAPTIVE_IMMUNE_RESPONSE	0.00073684	0.00844296
						EPIDERMIS_DEVELOPMENT	0.000770241	0.00870478
						CARBOHYDRATE_METABOLIC_PROCESS	0.000814288	0.00897162
						CALCIUM_ION_TRANSPORT	0.000815602	0.00897162
						BLOOD_COAGULATION	0.000909452	0.00974413
						COAGULATION	0.000909452	0.00974413
						HEMOSTASIS	0.000972997	0.0102913
						TRANSMEMBRANE_RECEPTOR_PROTEIN_TYROSINE_KINASE_SIGNALING_PATHWAY	0.000991953	0.010359
						ADAPTIVE_IMMUNE_RESPONSE_GO_0002460	0.00101452	0.0104349
						MESODERM_DEVELOPMENT	0.00102476	0.0104349
						CYCLIC_NUCLEOTIDE_MEDIATED_SIGNALING	0.00106945	0.0104349
						NEGATIVE_REGULATION_OF_CELLULAR_PROCESS	0.00107093	0.0104349
						EMBRYONIC_MORPHOGENESIS	0.00107297	0.0104349
						CENTRAL_NERVOUS_SYSTEM_DEVELOPMENT	0.00107511	0.0104349
						G_PROTEIN_SIGNALING_COUPLED_TO_CYCLIC_NUCLEOTIDE_SECOND_MESSENGER	0.00120995	0.0116071
						POSITIVE_REGULATION_OF_IMMUNE_SYSTEM_PROCESS	0.0013495	0.012797
						ENERGY_RESERVE_METABOLIC_PROCESS	0.00152414	0.0142888
						REGULATION_OF_IMMUNE_SYSTEM_PROCESS	0.00179099	0.0166018
						AXON_GUIDANCE	0.00199596	0.0182963
						FEMALE_PREGNANCY	0.00203787	0.0184752
						REGULATION_OF_SIGNAL_TRANSDUCTION	0.00210525	0.0188786
						NEGATIVE_REGULATION_OF_CELL_PROLIFERATION	0.00213904	0.0189753
						REGULATION_OF_MUSCLE_CONTRACTION	0.00220671	0.0193674
						REGULATION_OF_SECRETION	0.00226702	0.0196873
						ECTODERM_DEVELOPMENT	0.00273815	0.023531
						LYMPHOCYTE_ACTIVATION	0.00283197	0.0240864
						NEURITE_DEVELOPMENT	0.00300182	0.0252704
						INNATE_IMMUNE_RESPONSE	0.00311867	0.0259889
						VACUOLE_ORGANIZATION_AND_BIOGENESIS	0.00338636	0.0279375
						POSITIVE_REGULATION_OF_DEFENSE_RESPONSE	0.00343535	0.028061
						CAMP_MEDIATED_SIGNALING	0.00348486	0.0281863
						AXONOGENESIS	0.00357144	0.0286062
						CELL_RECOGNITION	0.00367626	0.0291626
						JAK_STAT_CASCADE	0.00374644	0.0294363
						REGULATION_OF_DEFENSE_RESPONSE	0.0038889	0.0301546
						REGULATION_OF_PROTEIN_SECRETION	0.00391096	0.0301546
						REGULATION_OF_NEUROGENESIS	0.00395579	0.0302179
						REGULATION_OF_RESPONSE_TO_STIMULUS	0.00426784	0.0323025
						CELL_CELL_ADHESION	0.00436723	0.0327542
						IMMUNE_EFFECTOR_PROCESS	0.00443429	0.0329576
						G_PROTEIN_SIGNALING_COUPLED_TO_CAMP_NUCLEOTIDE_SECOND_MESSENGER	0.00491093	0.0361743
						NEURON_DEVELOPMENT	0.00524501	0.0382932
						RESPONSE_TO_BIOTIC_STIMULUS	0.00534207	0.0386597
						G_PROTEIN_SIGNALING_COUPLED_TO_IP3_SECOND_MESSENGERPHOSPHOLIPASE_C_ACTIVATING	0.00570984	0.0409619
						REGULATION_OF_T_CELL_ACTIVATION	0.005812	0.0413353
						REGULATION_OF_IMMUNE_RESPONSE	0.00616379	0.0432903
						INTRACELLULAR_SIGNALING_CASCADE	0.00622083	0.0432903
						POSITIVE_REGULATION_OF_IMMUNE_RESPONSE	0.0062443	0.0432903
						REGULATION_OF_CELL_MIGRATION	0.00631301	0.0434019
						PROTEIN_KINASE_CASCADE	0.00665716	0.0451054
						HOMOPHILIC_CELL_ADHESION	0.00667013	0.0451054
						POSITIVE_REGULATION_OF_TRANSLATION	0.0067959	0.0455822
						INSULIN_RECEPTOR_SIGNALING_PATHWAY	0.00724407	0.0478312
						REGULATION_OF_ANATOMICAL_STRUCTURE_MORPHOGENESIS	0.00728576	0.0478312
						INTERCELLULAR_JUNCTION_ASSEMBLY	0.00730513	0.0478312
						REGULATION_OF_CYTOKINE_SECRETION	0.00738935	0.0480017
						G_PROTEIN_SIGNALING_ADENYLATE_CYCLASE_ACTIVATING_PATHWAY	0.00750607	0.0482056
						REGULATION_OF_CELL_GROWTH	0.0075376	0.0482056
